# A circuit-based approach to repair hypersexuality in Parkinson's disease

David Mata-Marín<sup>1,2,6\*</sup>, José Ángel Pineda-Pardo<sup>1,2\*</sup>, Mario Michiels<sup>1,2,6</sup>, Cristina Pagge<sup>1,2,6</sup>, Claudia Ammann<sup>1,2</sup>, Raúl Martínez-Fernández<sup>1,2</sup>, José Antonio Molina<sup>3</sup>, Lydia Vela-Desojo<sup>4</sup>, Fernando Alonso-Frech<sup>5</sup>, Ignacio Obeso<sup>1,2</sup>

\*Co-first authors

## Abstract

One common neuropsychiatric complication in patients with Parkinson's disease treated with dopamine replacement therapy is impulse control disorders. A proportion of patients under dopamine agonist exhibit excessive desire towards appetitive cues accompanied by lost control over behaviour in forms of pathological gambling, hypersexuality or binge eating. The balance between enhanced desire towards sexual cues and cognitive control changes has been hypothesized to be biased toward the former in individuals with hypersexuality and impulse control disorders. Yet, some studies report no behavioural differences in cognitive control differences between impulsive patients and general Parkinson's disease, suggesting possible functional changes along the mesocorticolimbic cortico-subcortical circuitry. Here, we provide evidence for this hypothesis by comparing the neurobiological substrate of sexual disturbance over response inhibition associated to medication states in Parkinson's disease patients with a specific subtype of impulse control disorders (i.e., hypersexuality).

We assessed the impact of sexual cues on response inhibition using a novel erotic stop signal task inside an fMRI. A total of 50 participants were included divided in 16 hypersexual and 17 non-hypersexual Parkinson's disease patients and 17 healthy controls. Task-related activations, functional and anatomical connectivity models were performed. Additionally, a separate sample of 20 hypersexual Parkinson's disease patients received excitatory neuromodulation (sham-controlled) over the pre-supplementary motor area (based on fMRI group-based results) aiming to improve response inhibition when exposed to sexual cues.

Compared with their non-hypersexual peers, medication perturbed response inhibition upon presentation of sexual cues in patients with hypersexuality, recruiting a network

**NOTE:** This preprint reports new research that has not been certified by peer review and should not be used to guide clinical practice. involving caudate, pre-supplementary motor area, ventral tegmental area, and anterior

cingulate cortex. Dynamic causal modelling revealed distinct best models to account for cortico-subcortical interactions with reduced task-related inputs in pre-supplementary motor area and descending connectivity to caudate in hypersexual compared to non-hypersexual Parkinson's disease patients (while medicated). This was sustained by enhanced fractional anisotropy and reduced mean diffusivity in the pre-supplementary motor area-caudate pathway. Importantly, stimulation over the pre-supplementary motor area improved response inhibition when exposed to sexual cues in hypersexual Parkinson's disease.

We identified a specific fronto-striatal and mesolimbic circuitry underlying uncontrolled sexual behaviours in Parkinson's disease induced by medication, with recovery options by applying neuromodulation.

**Author affiliations:**

1 HM CINAC. Centro Integral de Neurociencias AC. HM Puerta del Sur. HM Hospitales. Móstoles, Madrid, Spain.

2 Network Center for Biomedical Research on Neurodegenerative Diseases (CIBERNED), Instituto Carlos III, Madrid, Spain.

3 Hospital 12 de Octubre, Madrid, Spain.

4 Hospital Fundación Alcorcón, Madrid, Spain.

5 Hospital Clínico San Carlos, Madrid, Spain.

6 PhD program in Neuroscience, Autonoma de Madrid University, 28029 Madrid, Spain.

**Correspondence to:** Dr. Ignacio Obeso.

Avda. Carlos V, 70 Móstoles, 28938, Madrid, Spain.

[iobeso.hmcinac@hmhospitales.com](mailto:iobeso.hmcinac@hmhospitales.com)

[www.controlandhabit.com](http://www.controlandhabit.com)

**Running title:** Hypersexuality alters cognitive control.

**Keywords:** hypersexuality; dopamine; impulse control disorders; fMRI; neuromodulation.

**Abbreviations:** ACC = anterior cingulate cortex; fMRI = functional magnetic resonance imaging; ICD = Impulse Control Disorder; PD+HS = Parkinson's disease and hypersexuality; PD-HS = Parkinson's disease without hypersexuality; pre-SMA = pre-supplementary motor area; rTMS = repetitive transcranial magnetic stimulation; SSRT = stop signal reaction time; VTA = ventral tegmental area.

## 1 Introduction

2 Impulse control disorder (ICD) corresponds to one of the most acute and disturbing  
3 neuropsychiatric complication in Parkinson's disease patients under dopaminergic  
4 replacement therapy. The most prevalent forms include compulsive shopping,  
5 pathological gambling, sexual behaviours or binge-eating amongst others, all marked by  
6 the excessive tendency to compulsively engage in rewarding uncontrolled actions. ICDs  
7 are seen in about 17% of Parkinson's disease patients induced both by dopamine agonist  
8 and more rarely by levodopa (6.9%)<sup>1-4</sup>. ICD sets patients at increased risk of financial  
9 ruin, family problems, prosecution, or job-related problems. Yet, its treatment follows  
10 two clinical routes: reducing dopaminergic doses at the expense of worsening movement  
11 output or invasive surgery. Hence, no specific treatments are available in ICD, prompting  
12 the available therapeutic windows to be consumed earlier than expected<sup>5</sup>.

13 It is commonly accepted that ICD is the result of a dopaminergic dysregulation of the  
14 mesolimbic pathway – including the orbital prefrontal cortex, anterior cingulate cortex  
15 (ACC), ventral striatum (nucleus accumbens), amygdala and ventral tegmental area  
16 (VTA) – that mediates reward. Mesolimbic dopaminergic dysregulation is thought to  
17 result from a hyperdopaminergic state caused by the action of dopaminergic therapy in  
18 the lesser denervated limbic striatum compared to more affected motor territories of the  
19 striatum<sup>6</sup>. Indeed, the dopaminergic dysregulation changes reported in ICD along the  
20 mesolimbic pathway are similar to those seen in addiction pathophysiology<sup>7,8</sup>. As a result,  
21 enhanced desire towards appetitive items occurs in ICD, driving excessive approach  
22 behaviours that find little or no opposition.

23 A dysregulated limbic system in Parkinson's disease and ICD sets excessive desire to  
24 primary and/or secondary rewards, possibly interfering with the neurocognitive signature  
25 needed to apply cognitive control operations. Indeed, Parkinson's disease and ICD  
26 patients reveal larger tendency for novelty seeking<sup>9</sup> and enhanced incentive salience<sup>10,11</sup>,  
27 compatible with views on altered reward processing. Regarding cognitive control,  
28 Parkinson's disease and ICD modifies set-shifting abilities<sup>12-14</sup> and impairs adaptation  
29 from negative outcomes<sup>15-17</sup>. Moreover, these impulsive patients show preference for  
30 smaller immediate rewards over larger and delayed ones<sup>18,19</sup>. Yet, we are uncertain  
31 whether a lack of cognitive control, enhanced desire or their imbalance is the basis of ICD  
32 associated to mesocorticolimbic regions.

## Hypersexuality alters cognitive control

33 The “controlling brain network” in humans (namely inferior frontal gyrus, pre-  
34 supplementary motor area (pre-SMA), striatum and the subthalamic nucleus<sup>20–24</sup> is  
35 underactive in Parkinson’s disease and ICD patients when making monetary choices,  
36 partly clarifying the clinical problem showing uncontrolled behaviour<sup>25,26</sup>. Yet, unaltered  
37 response inhibition in Parkinson’s disease and ICD patients<sup>27,28</sup> contrasts with altered  
38 engagement of the controlling network<sup>29,30</sup> and increased engagement of the salience  
39 brain network responsible for switching between different brain neural dynamics<sup>31,32</sup>.  
40 Most studies include mixed ICD subtypes and evaluate behaviour with stimuli unrelated  
41 to their impulsive problem. Thus, to reduce the potential bias of unrelated stimuli with  
42 patient’s impulsivity, the study of one predominant ICD using ad-hoc provocative stimuli  
43 will better pinpoint the specific circuits part of the clinical issue.

44 To this, we recruited Parkinson’s disease patients with hypersexuality (PD+HS) and  
45 designed a novel paradigm combining erotic cues within a stop-signal task to investigate  
46 the behavioural, neural and connectivity (anatomical and functional) profile in PD+HS  
47 (study 1). Hypersexuality is one of the most common subtypes of ICD with an estimated  
48 prevalence of 13.6% in Parkinson’s disease<sup>2</sup>. Hence, given response inhibition is  
49 vulnerable to high-arousal stimuli<sup>33,34</sup>, we hypothesized that sexual cues will bias  
50 response inhibition by altering fronto-striatal networks in hypersexual Parkinson’s  
51 disease patients (PD+HS). Next, we hypothesized that response inhibition in PD+HS  
52 patients can be improved by means of repetitive transcranial magnetic stimulation (rTMS,  
53 study 2) – a non-invasive neuromodulation technique effective in improving response  
54 inhibition in the general and neuropsychiatric population<sup>35–37</sup>. Our design represents an  
55 advantage over prior studies as it counts with one ICD sub-type and assessed on response  
56 inhibition performance using ad hoc stimuli to provoke their symptomatology. The  
57 circuit-based approach hereby utilized may serve to elucidate the neurobiological changes  
58 when response inhibition is influenced by sexual desire in a specific subtype of ICD and  
59 use possible treatment options to offer novel therapies to a yet untreatable complication.

## 60 **Materials and methods**

### 61 **Participants**

62 Patients in both studies were heterosexual male and right-handed. In study 1, we included  
63 50 participants divided into 16 PD+HS patients, 17 non-hypersexual Parkinson’s disease

64 patients (PD-HS) and 17 controls (**Table 1**). Study 2 included 20 PD+HS patients. Both  
65 studies are consistent with sample sizes used in previous neuroimaging and stimulation  
66 studies in Parkinson's disease and ICD<sup>35,38</sup>. Patients met UK Brain Bank criteria for  
67 Parkinson's disease diagnosis. Due to the special recruitment criteria, 4 hospitals  
68 participated in the recruitment. Recruitment was confirmed after an initial interview with  
69 the neuropsychologist (with both patient and families) to confirm heterosexuality and  
70 hypersexuality ( $\geq 5$  on the sexual subscale of the Questionnaire for Impulsive-Compulsive  
71 Disorder in Parkinson's disease). The PD-HS group was selected based on absent or  
72 limited presence of ICD-related behaviours, while on-medication ( $< 4$  on the sexual  
73 subscale of the Questionnaire for Impulsive-Compulsive disorder in Parkinson's disease).  
74 Exclusion criteria were established based on presence of (i) cognitive dysfunction ( $\leq 24$   
75 on the Montreal Cognitive Assessment) (ii) depression ( $> 18$  in Beck Depression  
76 Inventory) or (iii) other severe comorbidities (e.g., history of substance abuse,  
77 homosexuality, hallucinations, or psychosis) detected during the interview. The study was  
78 approved by the Hospital Ethics Committee (17.03.0852E2-GHM).

## 79 Procedure

80 Patients were assessed while on and off-medication states (study 1, off-state defined as  
81 overnight dopaminergic drug withdrawal ~12hs) inside the functional MRI (fMRI)  
82 scanner with at least one week time between each session (order counterbalanced).  
83 Scores of internal arousal state were collected to obtain explicit measurements of sexual  
84 desire – by asking participants to mark between 0 (nothing) to 10 (very much) on how  
85 intense their internal state for pre-scanning was:

- 86 1. How much sexual appetite did you experienced in the last hour?
- 87 2. Did you feel increased libido in the last hour?

88 Similarly, after the fMRI session, in addition to the first 2 items above, the following  
89 items were included:

- 90 3. How much you felt nude images corrupted or slowed your responses?
- 91 4. How much you felt dressed images corrupted or slowed your responses?

92 Behavioural measures (classic stop signal task), neuropsychological, and  
93 neuropsychiatric tests were performed while on medication in both studies.

94 A single-blinded randomized controlled trial was designed to evaluate the acute effects  
95 of rTMS (study 2). Each patient underwent both real and sham stimulation sessions in  
96 separate two days maximum two-weeks apart (counterbalanced; on medication).  
97 Following stimulation, patients performed the erotic stop-signal task described below.

## 98 **The erotic stop-signal task**

99 We designed an erotic stop-signal task using sexual cues (2 parallel versions; using a  
100 previous database<sup>39</sup> and additional images). Erotic and non-erotic images (added to  
101 Prevost *et al.*<sup>39</sup>) were rated in a pre-experiment pilot phase, where healthy heterosexual  
102 male participants ( $n=22$ ; age ( $mean\pm sd=48.4\pm 2.5$ ) rated valence and arousal states of the  
103 new images. We selected the most consistent high-valued images to insert in the task  
104 design. Images of undressed (erotic) and dressed women (non-erotic) were displayed  
105 followed by left or right-pointing arrows (**Figure 1A**), where a left (index finger) or right  
106 keypress (middle finger) with their dominant hand (limited time-hold up to 1s) was  
107 required. On Stop trials (33%), a stop signal cue was presented after a variable stop signal  
108 delay (staircase procedure using 50ms steps) following go signals, asking patients to stop  
109 their ongoing response. Null events ranged between 3-5s. Measures included response  
110 initiation, stop signal reaction time (SSRT; integration method by replacing go omissions  
111 with the maximum reaction time values per participant<sup>40</sup>, stop signal delay and proactive  
112 action restraint as response delay effect (difference between erotic and non-erotic go  
113 reaction times). Go trials above 3.5 standard deviation from the participant's mean  
114 reaction time were discarded from the analysis. Twenty practice trials outside the scanner  
115 were performed before each scanning session. A total of 384 trials (192 per image  
116 condition) were performed per session, divided in five blocks of 77 trials per block.  
117 Stimulus presentation and response recording were controlled using E-prime 2.0.

## 118 **Erotic stop-signal task analysis**

119 As recommended<sup>40</sup>, we first evaluated the independence of the go and stop processes by:  
120 a) correlations between StopRespond reaction times and correct go trials of each stimuli  
121 condition (erotic and non-erotic) per participant; b) correlations between the go trials and  
122 SSRT; and c) plotting cumulative distributions of Go and StopRespond reaction times  
123 (**Figure 1C, 5A**).

## 124 **Behavioural, neuropsychological, and neuropsychiatric tests**

125 A classic stop signal task was used to obtain measures of response inhibition without  
126 presence of sexual cues. General cognition and executive measures were included to  
127 discard any cognitive downsides in our sample. To this, we employed the Montreal  
128 Cognitive Assessment<sup>41</sup> (as cognitive screening test) , the Stroop interference test, Frontal  
129 Assessment Battery, forward and backward digit span from Wechsler Adult Intelligence  
130 Scale IV<sup>42</sup>), phonemic and semantic fluencies. Neuropsychiatric variables that may  
131 influence ICDs were included (Barratt Impulsiveness Scale-11<sup>43</sup>; Geriatric Depression  
132 Scale<sup>44</sup>; Starkstein Apathy Scale<sup>45</sup>; Beck Anxiety Scale<sup>46</sup>). Last, a sexual inventory test  
133 (Brief Male Sexual Function Inventory<sup>47</sup>) was used to include the latest sexual activities  
134 in our sample.

## 135 **Imaging data acquisition**

136 Imaging data was collected using a 3T hybrid PET-MRI scanner (mMR Biograph,  
137 Siemens AG, Germany) with a 12-channel head array coil. Task-based fMRI was  
138 acquired using a single-shot gradient-echo echo-planar imaging (EPI) 2D pulse sequence  
139 with the following parameters:  $TR/TE = 2000/30\text{ms}$ ; optimum flip angle using the Ernst  
140 equation i.e.,  $79^\circ$ ,  $\text{spatial resolution} = 3 \times 3 \times 4\text{mm}^3$ ;  $\text{field of view} = 192\text{mm}$ ;  $\text{matrix} =$   
141  $64 \times 64$ ;  $\text{slice thickness} = 4\text{mm}$  and acceleration factor of 2 (IPAT2). Five fMRI runs were  
142 acquired per session (260 volumes per run, 12mins) with 2-min pause between runs.  
143 Imaging protocol also included a 3D T1-weighted MP-RAGE ( $TR/TE/TI =$   
144  $2300/3.34/900\text{ms}$ ;  $\text{flip angle} = 8$ ; and  $\text{isotropic spatial resolution} = 1\text{mm}^3$ ,  $FoV = 256\text{mm}$ ,  
145  $\text{matrix} = 256 \times 256$ ,  $\text{slice thickness} = 1\text{mm}$ ); a fieldmap generated from two 2D gradient-  
146 echo images ( $TR/TE1/TE2 = 455/4.92/7.38\text{ms}$ ,  $\text{flip angle} = 60^\circ$  with the spatial resolution  
147 as the fMRI EPI volumes); and diffusion weighted images (DWI) using a single-shot 2D  
148 spin-echo EPI sequence ( $TR/TE = 10000/102\text{ms}$ ;  $\text{isotropic resolution} = 2\text{mm}$ ). DWI were  
149 acquired for 64 non-collinear encoding directions with  $b\text{-value} = 1000\text{s/mm}^2$  and two  
150  $b = 0\text{s/mm}^2$  images with opposite polarity of the phase encoding direction (AP and PA).

## 151 **fMRI preprocessing steps**

152 T1-weighted anatomical images for all subjects were segmented into gray matter, white  
153 matter, and cerebrospinal fluid using the unified segmentation tool<sup>48</sup> provided in SPM12.  
154 Gray matter maps were then transformed into the Montreal Neurological Institute (MNI)

155 space using the DARTEL tool<sup>49</sup>. fMRI preprocessing was carried out with tools from FSL  
156 (FMRIB Software Library) and SPM12. Preprocessing included slice timing correction,  
157 motion correction by realigning to the first volume, correction of magnetic field  
158 inhomogeneities induced geometrical distortions and signal dropout, and co-registration  
159 to the anatomical images. Then, fMRI volumes were normalized to MNI space and  
160 smoothed with an 8mm<sup>3</sup> FWHM Gaussian kernel and filtered over time using a high-  
161 pass filter of 128s. Omission errors and presses during sexual cues were classified as  
162 errors for the fMRI analysis.

### 163 **Task-based fMRI analysis**

164 Task-related activities were analyzed by sexual cue types using the following regressors:  
165 Go, Stop-Inhibit, Stop-Respond, Null, and motion regressors, derivatives and quadratic  
166 forms, representing each event with an impulse function convolved with a canonical  
167 hemodynamic response function. fMRI significance was considered at  $p < .005$ , with FWE  
168 correction at the cluster level ( $p < .05$ ). Small-volume correction for anatomically defined  
169 regions of interest were conducted in some regions based on a priori hypothesis.

### 170 **Dynamic causal modelling**

171 To extract regional time series for dynamic causal modelling, we specified an  $F$  test across  
172 all trials ( $F$  contrast:  $p < .05$ ) to obtain the first eigenvariate of the brain-oxygen-level  
173 dependent imaging time series from 4 volumes of interest in Stop-Inhibit erotic vs. non-  
174 erotic contrast: pre-SMA [ $x=6, y=24, z=58$ ], ACC [ $x=0, y=24, z=36$ ], caudate [ $x=-10, y=8,$   
175  $z=14$ ] and VTA [ $x=-4, y=-16, z=-14$ ]. Each subject's  $F$  test was used to identify local  
176 maxima closest to the group peak to then extract the first eigenvariate from a 5mm sphere  
177 at the subject-specific peak.

178 Dynamic causal modelling<sup>50</sup> estimated the effective connectivity on 13 generative models  
179 representing alternative hypotheses of the causal interactions between cortico-subcortical  
180 areas guiding hypersexuality. Structural architecture of our models (**Figure S1**) was  
181 informed by primate anatomical and human functional connectivity<sup>51-58</sup>. All models were  
182 constructed, fitted, and compared for each patient (**Supplementary Material**). Bayesian  
183 model selection<sup>59</sup> was used to account for activity in the cortical and subcortical regions  
184 during the task and estimate the circuit abnormalities in hypersexuality<sup>59</sup>. Effective



185 connectivity strength and task-modulations were compared with random-effects Bayesian  
186 Model Averaging to obtain average connectivity estimates across models and patients<sup>59</sup>.

## 187 **Diffusion Weighted Image Acquisition**

188 After running whole brain diffusion tensor based tractography for each patient, the  
189 corresponding tracts from the dynamic causal modelling model were segmented.  
190 Preprocessing was performed using QSIPrep0.13.0RC1, which is based on Nipype  
191 1.6.0<sup>60,61</sup>.

## 192 **Diffusion Tensor Imaging Processing**

193 First, to ensure that diffusion tensor imaging was a viable model for this study, we  
194 inspected the different fibers directions for these tracts in the HCP1065 atlas and confirm  
195 they do not have a significant number of crossing fibers. Diffusion tensor estimation was  
196 carried out using the non-linear least-squares method implemented by Dipy. Spatial  
197 normalization in a tensor-based manner was done using dti-tk<sup>62</sup>. Then, tensors were  
198 normalized to a population template constructed by averaging each group of subjects.  
199 Finally, the images were mapped to 1mm<sup>3</sup> MNI space. Relevant features – fractional  
200 anisotropy, mean diffusivity – were extracted at this point using dti-tk. Then we ran a  
201 deterministic tracking algorithm implemented in trackvis<sup>63</sup>, which resulted in a whole  
202 brain tractography per subject.

203 For tract selection across groups, we used automated fiber quantification<sup>64</sup> to compute the  
204 fractional anisotropy and mean diffusivity over the tracts, ensuring that the approximate  
205 length and shape were similar between patients. A total of 100 nodes for fractional  
206 anisotropy values were obtained for each fibre bundle. To compute the difference  
207 between groups in fractional anisotropy and mean diffusivity, we conducted t-tests over  
208 the nodes for every tract (using TFCE as statistical method) between groups followed by  
209 non-parametric permutation tests ( $p < .05$ , FWE Holm-Bonferroni corrections). This  
210 analysis was implemented using the code from ptsa<sup>65</sup> and MNE<sup>66</sup>.

## 211 **Repetitive transcranial magnetic stimulation (rTMS)**

212 In study 2, we used rTMS (Magstim Rapid2 Plus1 stimulator, Magstim, Whitland, UK)  
213 to apply intermittent theta burst stimulation<sup>67</sup> over the pre-SMA [ $x=6$ ,  $y=24$ ,  $z=58$ ; Stop-  
214 Inhibit erotic vs non-erotic results in Study 1; **Table 3**], consisting of trains of 10 bursts

215 (2s) repeated every 10s for 20 cycles (600 pulses in total). Each burst consisted of a 3-  
216 pulse burst (50Hz) every 200ms with 100% intensity relative to patient's dominant-hand  
217 flexor digitorum. Scalp-to-cortex distance correction was used for intensity  
218 adjustments<sup>68</sup>. A T1-weighted MRI scan of each patient was used to determine the exact  
219 target location using Brainsight frameless stereotactic system (Rogue Research, Canada)  
220 and a Polaris infrared (NorthernDigital, Canada). Sham stimulation was performed using  
221 a sham-controlled coil (AirFilm Placebo, Magstim) controlling for device appearance and  
222 physiological properties (*i.e.*, sound) of stimulation.

## 223 **Statistical analysis**

224 Differences between conditions were analyzed using repeated-measures general linear  
225 model comparing medication (on vs. off) and condition (erotic vs. non-erotic) as the  
226 within groups variable and groups (PD+HS vs. PD-HS vs. controls) as between-group  
227 variable for successful and unsuccessful stop trials. When comparing SSRT between  
228 medication (on vs. off) and stimulation (real vs. sham), support for the alternative  
229 hypothesis ( $H_-$ :  $SSRT_{off} < SSRT_{on}$ ) vs the null hypothesis ( $H_0$ :  $SSRT_{off} = SSRT_{on}$ )  
230 was also assessed with Bayesian paired t-tests (as implemented in JASP<sup>69</sup>, with default  
231 effect size priors, Cauchy scale 0.707). Results are reported as one-tailed Bayes factor  
232 (*i.e.*,  $BF_{-0}$  represents  $p(\text{data}|H_-)/p(\text{data}|H_0)$ ). Moreover, correlations with  
233 neuropsychological and clinical variables were executed with response inhibition  
234 measures. Brain-behaviour Pearson correlations were executed between SSRT, and beta-  
235 weights extracted from brain regions of interests, fractional anisotropy, and mean  
236 diffusivity (mean values along the segments for each tract) and with effective connectivity  
237 (dynamic causal modelling). Additional Pearson correlations between changes in SSRT  
238 after rTMS and neuropsychological variables were calculated.

## 239 **Data availability**

240 Codes and data analysis pipelines can be found in [https://github.com/cinac-](https://github.com/cinac-cognition/tms_fmri_dti_hypersexual_pd)  
241 [cognition/tms\\_fmri\\_dti\\_hypersexual\\_pd](https://github.com/cinac-cognition/tms_fmri_dti_hypersexual_pd). Applications for de-identified anonymous data  
242 can be made to HM-CINAC by contacting the corresponding author. Public access to the  
243 patient's data is not permitted following our local ethical restrictions.

244 **Results**

245 **Clinical and demographics characteristics**

**Table 1. Demographic, clinical, and neuropsychological data for each group.**

|                                       | Study 1         |                 |                    | Stats* | Study 2         |
|---------------------------------------|-----------------|-----------------|--------------------|--------|-----------------|
|                                       | PD+HS<br>(n=14) | PD-HS<br>(n=14) | Controls<br>(n=16) |        | PD+HS<br>(n=18) |
| <i>Age</i>                            | 62.50±9.1       | 65.40±5.4       | 58.12±9.8          | .96    | 57.89±8.0       |
| <i>Education</i>                      | 12.50±4.3       | 12.93±3.9       | 14.35±3.4          | .69    | 12.71±2.9       |
| <i>Disease duration</i>               | 8.38±3.2        | 6.27±3.9        | -                  | .14    | 6.89±4.5        |
| <i>UPDRS-III<sup>a</sup></i><br>(OFF) | 29.31±7.4       | 27.80±10.4      | -                  | .41    | 28.65±11.4      |
| <i>UPDRS-III</i> (ON)                 | 15.13±5.1       | 14.53±6.2       | -                  | .73    | 17.47±7.71      |
| <i>LEDD<sup>b</sup></i> (total)       | 740.63±273.3    | 549.29±293.2    | -                  | .12    | 738.61±631.2    |
| <i>LEDD<sup>c</sup></i> (DA)          | 206.67±84.3     | 171.82±76.4     | -                  | .44    | 362.67±74.3     |
| <i>LEDD<sup>d</sup></i> (L-dopa)      | 583.33±237.3    | 527.27±262.0    | -                  | .52    | 375.94±286.8    |
| <i>QUIP<sup>e</sup></i> total         | 16.24±11.9      | 5.27±8.5        | 7.88±10.6          | <.01   | 30.89±14.99     |
| Hypersexual                           | 6.41±3.9        | 1.20±1.7        | 1.47±1.8           | <.001  | 8.61±3.78       |
| Gambling                              | 0.65±1.2        | 0.20±0.5        | 0.29±0.9           | .21    | 1.00±2.17       |
| Shopping                              | 1.76±2.3        | 0.67±1.4        | 1.47±1.7           | .12    | 3.83±4.45       |
| Binge eating                          | 2.76±3.3        | 0.67±1.1        | 1.46±1.9           | .02    | 4.33±2.99       |
| Hobbyism                              | 1.35±2.2        | 1.00±1.9        | 1.65±2.3           | .63    | 4.56±4.02       |
| Pounding                              | 1.24±2.3        | 0.67±1.8        | 1.47±2.3           | .45    | 4.11±3.72       |
| Medication                            | 2.12±3.6        | 0.87±1.7        | 0.06±0.2           | .23    | 4.44±4.08       |
| <i>MoCa<sup>f</sup></i>               | 27.67±1.5       | 28.00±1.3       | 27.42±1.2          | .41    | 27.94±2.1       |
| <i>Stroop</i>                         | 79.6±37.3       | 62.6±14.5       | 51.18±16.5         | .10    | 57.89±8.1       |
| <i>FAB<sup>g</sup></i>                | 17.33±0.9       | 16.93±1.8       | 17.94±0.2          | .24    | 16.88±1.8       |
| <i>GDS<sup>h</sup></i>                | 7.92±4.4        | 8.77±6.1        | 3.59±2.4           | .59    | 8.18±7.1        |
| <i>BAI<sup>i</sup></i>                | 11.85±5.0       | 14.69±8.5       | 6.94±4.3           | .29    | 12.06±10.0      |
| <i>SAS<sup>j</sup></i>                | 10.08±4.7       | 12.15±8.8       | 4.29±4.6           | .46    | 11.94±6.4       |
| <i>BIS-III<sup>k</sup></i>            | 79.50±18.5      | 73.69±12.6      | 81.08±12.8         | .39    | 58.44±8.4       |
| <i>BSFI<sup>l</sup></i>               | 26.82±10.2      | 21.00±7.1       | 23.75±12.5         | .11    | 12.71±2.9       |

Stats: unpaired t-test between PD+HS and PD-HS; between groups; <sup>a</sup>*UPDRS-III*: Unified Parkinson's Disease Rating Scale; <sup>b</sup>*LEDD*: Levodopa Equivalent Daily Dose (total mg). <sup>c</sup>*LEDD-DA*: Levodopa Equivalent Daily Dose of Dopamine Agonist (total DA mg); <sup>d</sup>*LEDD-L-dopa*: Levodopa Equivalent Daily Dose (total Levodopa mg); <sup>e</sup>*QUIP*: Questionnaire for Impulsive-Compulsive; <sup>f</sup>*MoCa*: Montreal Cognitive Assessment; <sup>g</sup>*FAB*: Frontal Assessment Battery; <sup>h</sup>*GDS*: Geriatric Depression Scale; <sup>i</sup>*BAI*: Beck's Anxiety Inventory; <sup>j</sup>*SAS*: Starkstein Apathy Scale; Disorders in Parkinson's; <sup>k</sup>*BIS-III*: Barratt Impulsiveness Scale; <sup>l</sup>*BSFI*: Brief Sexual Function Inventory.

246 Groups were matched in terms of age, education, and clinical variables. While PD+HS  
 247 patients also experienced other ICD subtypes in addition to hypersexuality (**Table 1**), it  
 248 was the most dominant ICD subtype according to the initial interview (patient and  
 249 families) and scores on the Questionnaire for Impulsive-Compulsive Disorder in  
 250 Parkinson's disease. Binge eating was the 2<sup>nd</sup> most frequent subtype in our sample.  
 251 Evaluation of sexual arousal before and after task performance was collected to ensure  
 252 the observed behaviour and fMRI signals were based on a real sexual change (**Table 2**).  
 253 A total sample size of 14 PD+HS, 14 PD-HS and 16 controls were included in the final  
 254 analysis (study 1). Excluded patients were due to significant reductions in their

255 hypersexuality between scanning sessions ( $n=2$  PD+HS patients) and motion artifacts  
 256 ( $n=3$  PD-HS patients;  $n=1$  control). Secondly, a total of 18 PD+HS patients were included  
 257 in the final analysis (study 2) as reduced hypersexuality between neuromodulation  
 258 sessions was seen ( $n=2$ ). As part of the recruitment process (not included in the initial  
 259 sample size), two-step interviews rejected  $n=7$  patients ( $n=1$  depressed patient,  $n=1$   
 260 unwilling to spend time in the scanner,  $n=3$  had cognitive deficits,  $n=2$  homosexual  
 261 patients).

## 262 Behavioural results

**Table 2. Sexual desire pre- vs. post-task performance and exposure to sexual visual stimuli.**

|                    | pre-task           | post-task          | <i>p</i> -values   |
|--------------------|--------------------|--------------------|--------------------|
| <b>Off session</b> |                    |                    |                    |
| <i>PD+HS</i>       | 2.76±1.1           | 4.43±1.3           | <.001 <sup>a</sup> |
| <i>PD-HS</i>       | 0.90±0.6           | 1.10±0.7           | .18 <sup>a</sup>   |
| <i>p</i> -values   | <.001 <sup>b</sup> | <.001 <sup>b</sup> |                    |
| <b>On session</b>  |                    |                    |                    |
| <i>PD+HS</i>       | 2.74±0.9           | 5.65±1.0           | <.001 <sup>a</sup> |
| <i>PD-HS</i>       | 0.60±0.5           | 0.90±0.5           | .09 <sup>a</sup>   |
| <i>p</i> -values   | <.001 <sup>b</sup> | <.001 <sup>b</sup> |                    |

Results obtained from average values of first two items on the arousal scale. <sup>a</sup>Paired t-test comparison; <sup>b</sup>unpaired t-test comparison.

263 Our ad-hoc behavioural task generated enhanced arousal in PD+HS patients while on-  
 264 medication (**Table 2**). Under the race stopping model, going and stopping are supposed  
 265 to act independently<sup>70</sup>, confirmed in our data following recommended tests<sup>40</sup>, such as  
 266 faster StopRespond reaction times compared to go trials (**Figure 1C**; **Supplementary**  
 267 **Material**). Group and medication effects modulated differently response inhibition  
 268 [**Table S1**; **Figure 1B**; medication x group,  $F(2,44)=5.92$ ,  $p=.006$ ; group,  $F(2,44)=7.07$ ,  
 269  $p=.002$ ], where post-hoc tests showed significant medication effects in PD+HS [ $t(12)=-$   
 270  $3.06$ ,  $p=.01$ ] with strong evidence that response inhibition was impaired by medication  
 271 and sexual cues [ $BF_{0=} 11.60$ ; see sequential analysis in **Figure S2**]. Performance before  
 272 medication (off medication) explained improved SSRT in PD+HS (positive correlations  
 273 between SSRT on-off medication difference and on medication;  $r=.753$ ,  $p=.003$ ; **Figure**  
 274 **1E**). Proactive response delay effects were modulated by group [ $F(1,44)=4.11$ ,  $p=.02$ ],  
 275 explained by increased response adaptation in controls compared to PD+HS (on  
 276 medication,  $p=.02$ ) and PD-HS patients (on medication,  $p=.01$ ; **Figure 1D**) and by  
 277 medication [ $F(1,44)=4.52$ ,  $p=.04$ ], as evident from faster adaptation while on medication  
 278 in PD+HS [ $p<.03$ ; **Figure 1D**]. As expected, classic measures of response inhibition

279 (without erotic cues) revealed no impairments in PD+HS compared to controls  
 280 (Supplementary Material).

281 **Figure 1. Behavioural paradigm and results. SSRT estimates as a function of**  
 282 **Group and Medication conditions in Study 1.**

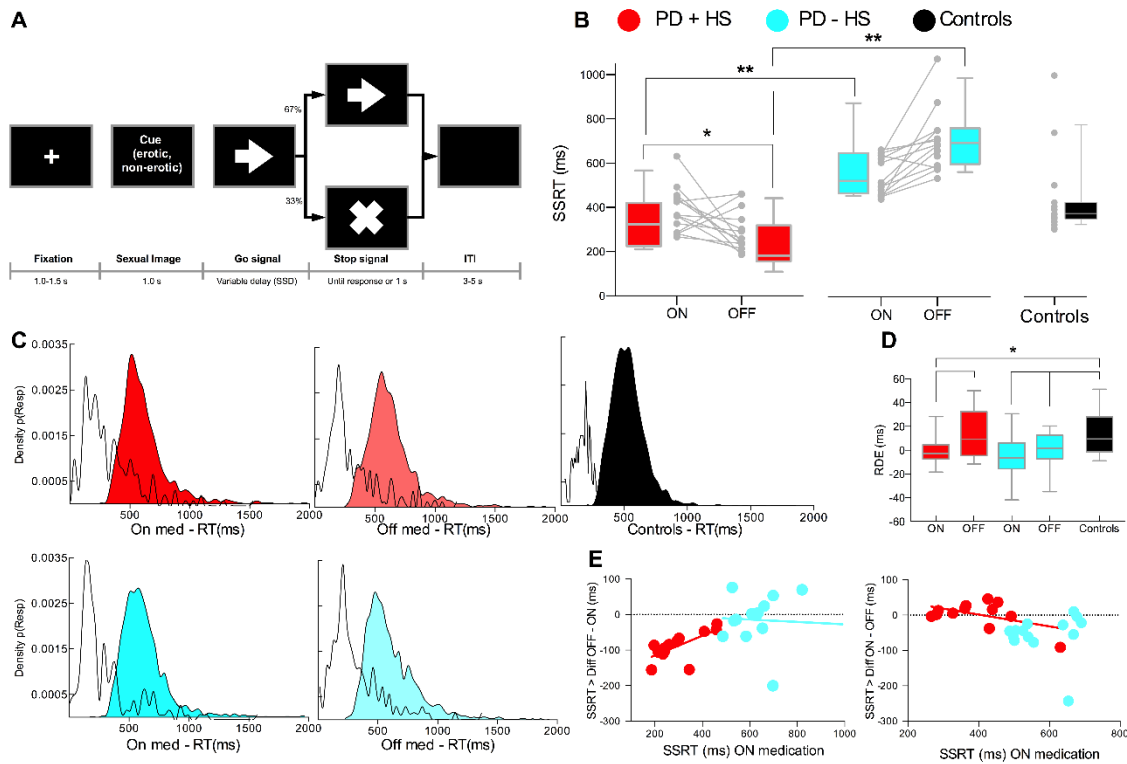

283 Study 1 (A) Task trial example; (B) SSRT for groups and individual dots per group and medication states; (C) Density distribution  
 284 for *StopRespond* and *Go* conditions; (D) *Response delay effect (RDE)* between erotic and non-erotic go trials; (E) Within-subject  
 285 change in *SSRT* from off to on levodopa medication is illustrated with single dots correlations showing greater benefits in response  
 286 inhibition (i.e., reduction in *SSRT* from “off” to “on” status). \* $p < .05$ ; \*\* $p < .01$ . Results are shown as box-and-whisker plots with each  
 287 box representing the 10–90 percentile where medians are represented by internal lines.

## 288 **fMRI results**

### 289 **Neural Network for inhibition under erotic influence**

290 To decipher the key areas behind successful inhibition (Stop-Inhibit) under sexual  
 291 influence, a general linear model on group, condition and medication revealed a  
 292 medication by group interaction and medication effect over superior parietal lobe activity  
 293 (Table 3; Figure 2A). This effect was driven by the PD+HS group also significantly  
 294 recruiting the ACC, middle frontal gyrus, caudate and VTA (Table 3; Figure 2B).  
 295 Meanwhile, a group effect showed increased activity over the pre-SMA in the PD+HS  
 296 compared to PD-HS group (on medication; Table 3; Figure 2C). Moreover, successful

297 inhibition of actions (compared to unsuccessful inhibition) revealed a main effect of  
 298 medication over superior parietal lobe, ACC, and supplementary motor complex (**Table**  
 299 **S3; Figure S3A**). This effect was mediated by the PD+HS group (on vs off medication)  
 300 showing enhanced activity in frontal pole, supplementary motor area and inferior frontal  
 301 gyrus (**Table S3; Figure S3B**).

**Table 3. Stop-Inhibit in Erotic vs. Non-Erotic trials.**

|                                               | T-value | X   | Y   | Z   | Stats |
|-----------------------------------------------|---------|-----|-----|-----|-------|
| <b>Medication</b>                             |         |     |     |     |       |
| <i>Superior parietal lobe</i>                 | 4.02    | -62 | -8  | -14 | *     |
|                                               | 3.29    | -56 | 4   | -18 | *     |
|                                               | 3.89    | -52 | -20 | 54  | *     |
| <b>PD+HS on &gt; off</b>                      |         |     |     |     |       |
| <i>Superior parietal lobe</i>                 | 4.04    | -34 | -6  | 64  | **    |
| <i>Middle frontal gyrus</i>                   | 3.67    | -14 | 28  | 58  | **    |
| <i>Anterior cingulate cortex (dorsal)</i>     | 3.62    | 10  | 26  | 46  | **    |
|                                               | 3.53    | 4   | 28  | 20  | *     |
| <i>Caudate</i>                                | 3.50    | -6  | 8   | 16  | *     |
|                                               | 3.36    | -14 | 2   | 14  | *     |
| <i>Ventral tegmental area (VTA)</i>           | 3.37    | -2  | -16 | -12 | *^    |
| <b>PD+HS &gt; PD-HS on</b>                    |         |     |     |     |       |
| <i>Superior parietal lobe</i>                 | 4.35    | -52 | -20 | 54  | **    |
|                                               | 3.91    | -36 | 2   | 60  | **    |
|                                               | 3.84    | -42 | -26 | 46  | **    |
| <b>Pre-supplementary motor area (Pre-SMA)</b> |         |     |     |     |       |
|                                               | 3.77    | 6   | 24  | 58  | **    |
|                                               | 3.73    | -14 | 30  | 58  | **    |
|                                               | 3.66    | -24 | 22  | 56  | **    |

Tests and anatomical structures for the successful (stop-inhibit) in erotic vs. non-erotic trials.  $p < .05$  FWE cluster-wise corrected; \* $p < .005$ ; \*\* $p < .001$ .

302 **Figure 2. Neural correlates for successful inhibition in erotic vs non-erotic**  
 303 **conditions.**

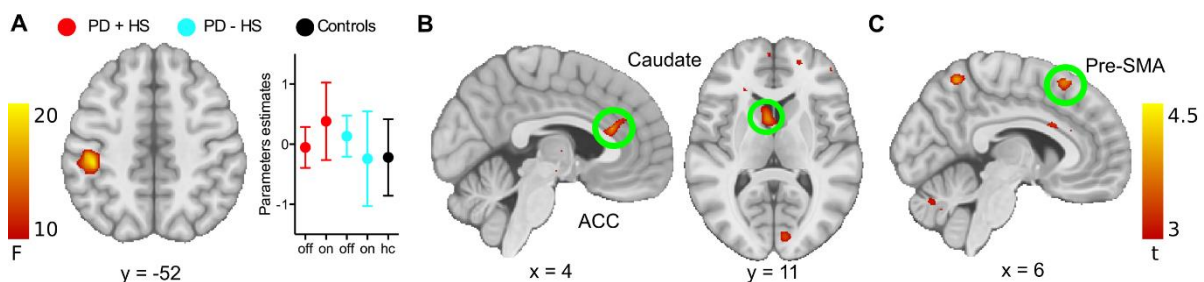

304  
 305 (A) Medication x Group interaction with parameter estimates over superior parietal cortex per group; (B) Medication effect revealing  
 306 increased activity in PD+HS comparing on vs. off medication states; (C) Group effect revealing enhanced activity in the PD+HS  
 307 group compared to PD-HS (on medication).

308 **Neural correlates of successful and unsuccessful inhibition under erotic influence**

309 Following sexual cues, successful (Stop-Inhibit) compared to unsuccessful inhibition  
310 showed a disease x medication interaction as well as in medication effects in the  
311 postcentral gyrus over the parietal cortex (**Table S4**). Post-hoc tests showed significant  
312 activity increase in the PD+HS group (compared to PD-HS group while medicated) in the  
313 precuneus and supplementary motor area as well as the superior parietal lobe (**Table S4**).  
314 In contrast, when looking at the specific activity patterns in unsuccessful inhibition for  
315 the erotic (against non-erotic trials), we observed a disease x medication interaction over  
316 the ACC (**Table S5**). This activity was guided by the PD-HS group, which showed  
317 significantly higher activity than PD+HS patients in the ACC while medicated (**Table**  
318 **S5**).

319 **Unsuccessful inhibition under erotic influence**

320 Given hypersexuality may be driven by failure to control ongoing behaviour when  
321 exposed to sexual cues, we analysed the erotic influence over failed inhibition at the  
322 neural level. Failing to stop specifically under erotic influence (erotic vs. non-erotic trials)  
323 revealed a significant medication x group interaction over the superior parietal lobe,  
324 supplementary motor area and superior frontal gyrus (**Table S5**). Such interaction  
325 revealed in PD+HS patients (on vs. off) a significant cluster activity over the left caudate  
326 ( $p < .005$ , small volume correction FWE corrected; **Table S5**), a region that is also present  
327 during Stop-Inhibit in erotic trials.

328 **Cortico-subcortical influences underlying response inhibition**

329 The cortico-subcortical model comparison revealed striking results: there was strong  
330 evidence in favour of one model above all others (model 12; **Figure 3B**). Across groups,  
331 the pre-SMA to both caudate and ACC connections were excitatory (**Figure 3A**).  
332 Importantly, significant differences in pre-SMA-caudate connectivity were seen between  
333 PD+HS ( $0.004 \pm 0.006$ ) and PD-HS patients ( $0.02 \pm 0.03$ ) while medicated ( $p = .02$ ; **Figure**  
334 **3C**). Moreover, pre-SMA-caudate connectivity was modified by medication in PD+HS  
335 (on vs. off:  $p = .03$ ; **Figure 3C**). Local intrinsic connectivity in the caudate correlated with  
336 SSRT in PD+HS patients while medicated ( $r = .55$ ,  $p = .04$ ), which reflects local neuronal  
337 adaptation, suggesting an altered neurobiological link to response inhibition changes.

338 **Figure 3. Dynamic causal modelling (DCM), winning model and group differences.**

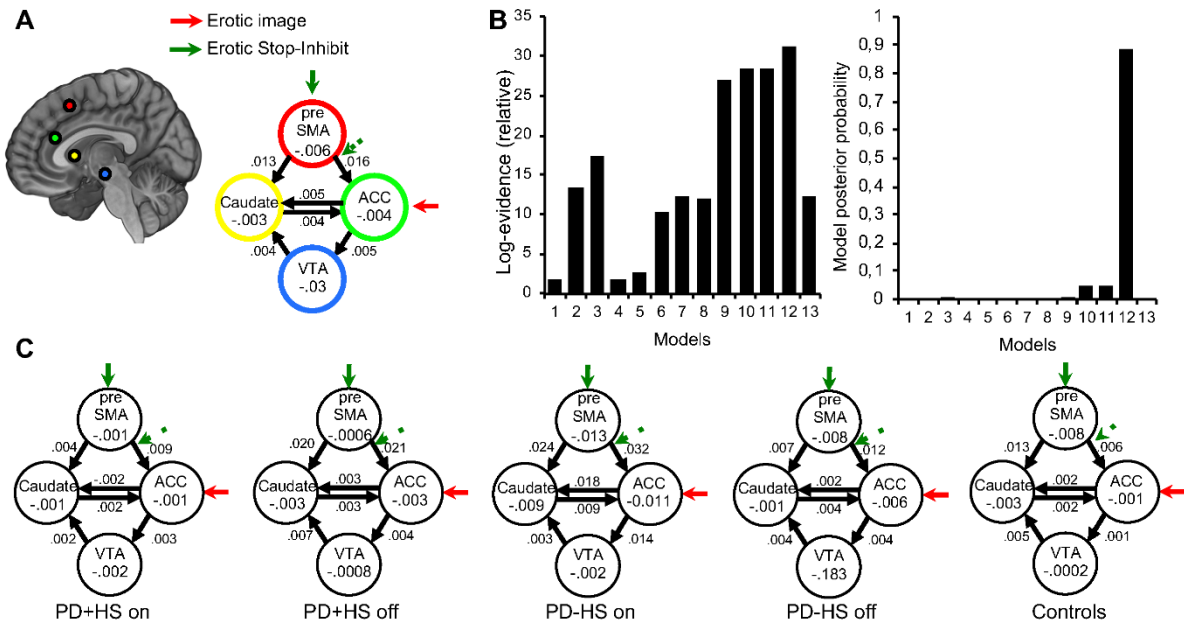

339

340 (A) Bayesian Model Selection (BMS): dotted arrows indicate modulatory effects of stopping (correct stop-inhibit) and erotic cues.  
 341 Solid bold arrows indicate driving inputs of task performance locally. Models share local effects of task on pre-SMA structure. The  
 342 most likely model counts with increased excitatory connectivity from the pre-SMA to the caudate and ACC (DCM.A average  
 343 connectivity). This connectivity is modulated locally in pre-SMA by task (DCM.B) and by modulatory inputs in descending  
 344 connection towards ACC (DCM.A). Bidirectional connections between ACC and caudate are detected (DCM.A); (B) Using the free-  
 345 energy estimate of the log-model evidence between models, very strong evidence was found in favor of one model (Figure 3A). The  
 346 group posterior probability (close to 1) illustrates the strong support for the most likely model; (C) Model connectivity values after  
 347 Bayesian parameter averaging at the group level reveal reduced excitatory connectivity in pre-SMA to caudate pathway between  
 348 PD+HS and PD-HS patients. Ultimately, local task modulation over pre-SMA differed between patients.

349 **Local modulatory effects of Stop-Inhibit**

350 The winning effective connectivity model revealed a task modulation (Stop-inhibit in  
 351 erotic vs non-erotic) over pre-SMA, significantly different between PD+HS ( $0.04 \pm 0.11$ )  
 352 and PD-HS groups ( $-0.10 \pm 0.16$ ;  $p = .01$ ; **Figure 3C**). This finding is indicative of local pre-  
 353 SMA differential responses to stop cues between patients may contribute descending  
 354 aberrant signals to control behaviour.

355 **Structural connectivity**

356 We observed bilateral significant differences in the pre-SMA-caudate tract, showing  
 357 higher fractional anisotropy values and lower mean diffusivity (**Figure 4B**) in PD+HS  
 358 compared to PD-HS group and controls (**Figure S4**). Interestingly, the opposite pattern  
 359 is seen for the caudate-ACC tract with lower fractional anisotropy but also reduced mean  
 360 diffusivity values in PD+HS compared to PD-HS patients; **Figure 4C**). The VTA-caudate



## Hypersexuality alters cognitive control

361 tract could not be robustly reconstructed with the diffusion tensor imaging model and the  
362 proposed tractography algorithm, thus excluded from the analysis. Along the right pre-  
363 SMA-caudate tract, mean diffusivity values showed a positive SSRT correlation for PD-  
364 HS patients ( $r=.79$ ,  $p=.01$ ; **Figure S5**) but a non-significant negative correlation in  
365 PD+HS (off medicated,  $r=-.20$ ;  $p=.61$ ; **Figure S5**). Thus, structural connectivity predicted  
366 behavioural changes between patients' groups.

367 **Figure 4. Tracts representation and diffusion tensor imaging (DTI) scalar measures**  
368 **– fractional anisotropy (FA), mean diffusivity (MD\*).**

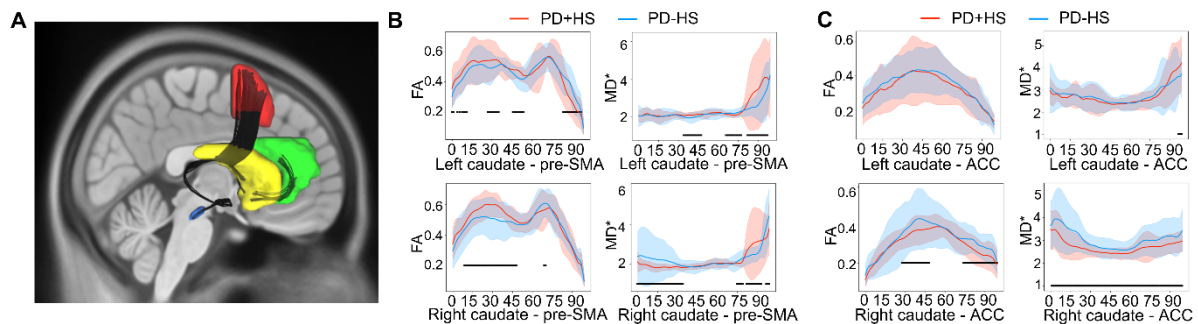

369  
370 Comparisons included PD+HS ( $n=10$ ) and PD-HS patients ( $n=14$ ) and controls ( $n=13$ ); **(A)** Tracts segmentation between areas in the  
371 dynamic causal modelling (DCM; VTA, caudate, ACC, pre-SMA) in the HCP1065 template, superposed on a T1 MNI template; **(B)**;  
372 **(C)** FA and MD along the segments of each tract. Significant differences ( $p < .05$  corrected) along the segments between the groups  
373 are underlined in black (see Supplementary Material for more details about the thresholding procedure).

### 374 **Structural connectivity predicts effective connectivity**

375 We tested fractional anisotropy and mean diffusivity correlations with dynamic causal  
376 modelling parameters in cortico-subcortical tracts. A relevant approaching significance  
377 negative correlation was found between fractional anisotropy and dynamic causal  
378 modelling from the right pre-SMA and caudate connection in PD+HS patients ( $r=-.69$ ,  
379  $p=.06$ ). Thus, higher fractional anisotropy in PD+HS patients corresponds to lower  
380 effective connectivity (**Figure S6**), consistent with pathological compensatory responses  
381 to preserve functional connectivity<sup>71,72</sup>.

### 382 **Non-invasive brain stimulation: repairing hypersexual behaviour**

383 Following real intermittent theta burst stimulation over the pre-SMA (compared to sham),  
384 significant improvement of response inhibition was found in PD+HS patients for erotic  
385 ( $p=.02$ ) and non-erotic ( $p=.04$ ) stimuli (**Figure 5B**), an effect showing moderate evidence  
386 towards the alternative hypothesis [ $BF_0=3.40$ ; sequential analysis in **Figure S7**].  
387 Moreover, faster Go reaction times in both erotic ( $p=.06$ ) and non-erotic ( $p=.04$ ) stimuli

## Hypersexuality alters cognitive control

388 were seen across patients (**Figure 5C**). Independence race-model assumptions were also  
389 confirmed in this study (**Figure 5A; Supplementary Material**). Correlation analysis  
390 between response inhibition and backwards digit span correlated with larger  
391 improvements in SSRT after intermittent theta burst stimulation ( $r=.49$ ;  $p=.03$ ). Finally,  
392 results were not affected by possible session order effects (**Supplementary Material**).  
393 **Figure 5. Neuromodulation effects on cognitive control and hypersexuality. Study 2.**

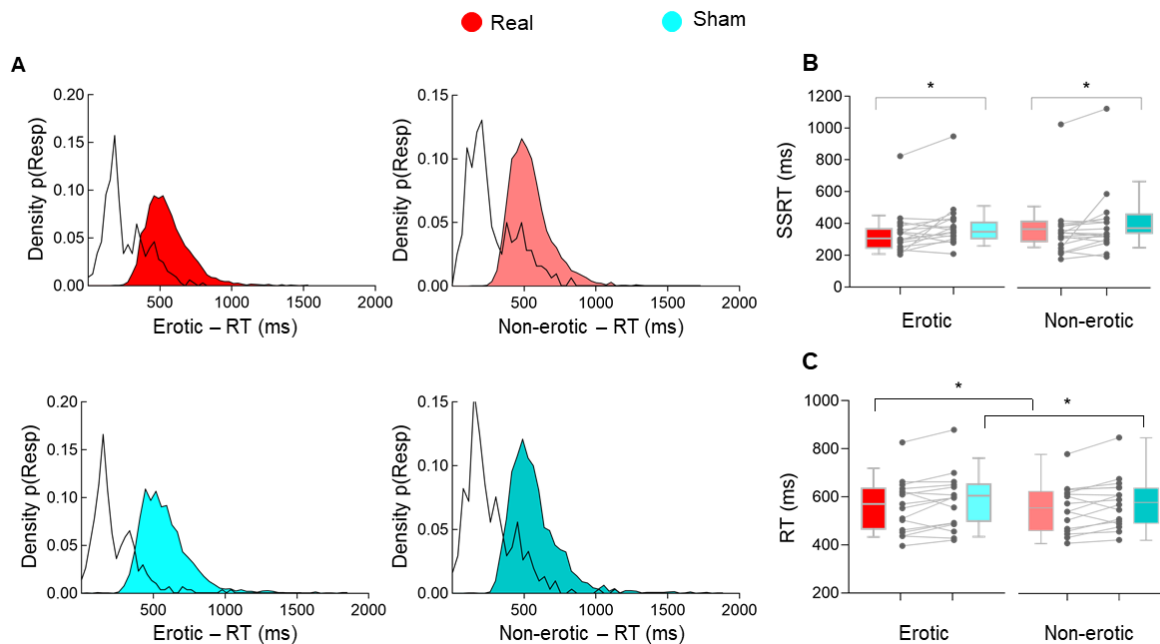

394 (A) Density distribution for *StopRespond* (white distribution) and *Go* trials (coloured) per stimulation session and per trial type; (B)  
395 Boxplot and individual values for *SSRT* and (C) *Go* trials reaction times for erotic and non-erotic trials after real and placebo  
396 stimulations.  $*p < .05$ ; Results are shown as box-and-whisker plots with each box representing the 10–90 percentile where medians are  
397 represented by internal lines.

## 398 Discussion

399 Impaired response inhibition was found in PD+HS when exposed to sexual cues while on  
400 medication. The cortico-striatal regions responsible for uncontrolled sexual behaviours  
401 included inhibitory hubs such as the pre-SMA, but also the VTA, caudate and ACC as  
402 part of the limbic system. Effective connectivity models revealed less engagement of pre-  
403 SMA in stop-related trials and reduced functional connectivity with the caudate in  
404 PD+HS compared to PD-HS patients, showing opposite SSRT correlations between  
405 patients. This functional change was held by enhanced fractional anisotropy and reduced  
406 mean diffusivity in the pre-SMA-caudate pathway in PD+HS. Importantly, excitatory  
407 neuromodulation over the pre-SMA improved response inhibition under sexual influence  
408 in PD+HS patients. Our results provide compelling evidence to understand the

409 neurobiological underpinnings of hypersexual behaviour and reveal, to the best of our  
410 knowledge, a first attempt using non-invasive neuromodulation to repair hypersexuality  
411 in Parkinson's disease.

#### 412 **Sexual cues impair response inhibition in PD+HS patients**

413 We observed greater disruption of response inhibition upon presence of sexual cues  
414 driven by dopaminergic medication (**Figure 1B**). Moreover, proactive control between  
415 conditions was reduced while on medication (**Figure 1D**), suggesting some form of  
416 anticipatory maladaptation in PD+HS. In other words, dopaminergic drugs impaired  
417 controlling systems needed to respond upon sexual signals, since PD+HS patients showed  
418 no impairments in response inhibition in a classic stop signal task. Hence, our results add  
419 notions of updated behavioural methods (ad-hoc stimuli related to the clinical problem)  
420 to test cognitive disturbances and help solving current debates on why some studies report  
421 unimpaired response inhibition in ICD<sup>27,28</sup>.

422 Given reward sensitivity increases in Parkinson's disease patients while medicated<sup>73,74</sup>,  
423 our results support a bias towards enhanced incentive salience that puts constraints on the  
424 controlling functions of the addicted brain. The incentive salience hypothesis<sup>75</sup> suggests  
425 combinations of previously acquired cue–reward associations may put significant  
426 constraints over behaviour. In addition, the impaired response inhibition and salience  
427 attribution model proposes both systems as responsible in guiding patients towards  
428 addiction<sup>76</sup>. Given emotional inputs deactivate essential cognitive control regions<sup>77</sup>,  
429 presence of previously experienced sexual cues shall downgrade top-down control and  
430 permit uncontrolled sexual behaviour to occur. Thus, prior reports showing intact  
431 cognitive control abilities in ICD<sup>27,28</sup> may be re-framed as a net effect on inhibition, as no  
432 inputs from cue–reward associations were currently influencing patients' behaviour. Our  
433 results go in line with both enhanced sensitivity to sexual cues together with reductions  
434 in response inhibition ability, consistent with the inhibition and salience attribution  
435 model<sup>76</sup>.

#### 436 **Dysfunctional circuitry in hypersexuality: functional and anatomical changes**

437 The circuitry mediating sexual events in healthy people activates limbic areas such as the  
438 ventral striatum, amygdala, ACC, parietal and orbitofrontal cortex<sup>78–81</sup>. Controlling  
439 sexual actions, in contrast, recruits specific regions of the inhibitory network including

## Hypersexuality alters cognitive control

440 the pre-SMA, inferior-frontal gyrus, superior parietal cortex and ACC<sup>82-84</sup>. Here, we  
441 found increased limbic (including ACC, VTA and caudate) and pre-SMA activity during  
442 response inhibition under sexual influence in PD+HS patients (on vs. off medication)  
443 compared to PD-HS patients (**Figure 2C**).

444 We interpret these findings as an abnormal mesocorticolimbic enhancement without  
445 controlling functions leading to PD+HS. Upon a faulty mesocorticolimbic circuitry due  
446 to dopamine agonists, including the VTA, ACC and ventral striatum<sup>85,86</sup>, enhanced  
447 “wanting” may thus lead to “hard to resist” reward compulsive search<sup>38,87,88</sup>. Hence, the  
448 combined “wanting” and “hard to resist” elements may integrate the neurobiological  
449 foundations of hypersexual behaviour often found in Parkinson’s disease patients.  
450 PD+HS patients reported heightened sexual desire after task performance (**Table 2**),  
451 which may require a larger cortical recruitment to generate some form of controlled  
452 behaviour. Thus, a combination of dysfunctional dopaminergic bottom-up (limbic) and  
453 top-down (executive) control under medication may boost uncontrolled desire in our  
454 patients, explained by the combination of regions here reported. This view matches well  
455 according to the dual control model of sexual response<sup>89</sup>, where a shared duality between  
456 sexual excitatory and inhibitory mechanisms regulates sexual behaviour. Together with  
457 their model, plasticity alterations after persistent reward cue-exposure<sup>75,90</sup> may predispose  
458 one of the two dual systems to set disproportional high sexual excitation or  
459 disproportional low sexual inhibition. Our results support the view that an enhanced  
460 sexual excitation system along the mesocorticolimbic system finds no or reduced  
461 opposition from prefrontal top-down control regions, leading to perturbed control of  
462 sexual behaviour.

463 Yet, it is difficult to understand how the causality and directionality of active task-based  
464 fMRI regions are involved in PD+HS. As revealed by a winning functional connectivity  
465 model (**Figure 3B**), the pre-SMA and its connectivity with the caudate put forward 2  
466 pathophysiological assumptions in the hypersexual circuit: the pre-SMA showed a  
467 reduced response to task-related signals and weakened its excitatory connection with the  
468 caudate (**Figure 3C**). Such top-down dysfunctional connection (based on dynamic causal  
469 modelling) was linked to an anatomical increase (based on fractional anisotropy tracts) in  
470 PD+HS (approaching significance values). Ultimately, opposite correlations between  
471 patients were seen between the pre-SMA-caudate tract and SSRT, which altogether  
472 suggests a dual neurobiological problem (local and descending pre-SMA connectivity) in

473 the cognitive control network<sup>91,92</sup>. Thus, reductions in top-down control rely upon  
474 paradoxical increases of white matter integrity, a possible neural compensatory response  
475 previously reported in Parkinson's disease and ICD<sup>72,93,94</sup>.

476 The neurobiological changes in pre-SMA to caudate connectivity in our PD+HS sample  
477 may be explained by repeated exposure to sexual cues and plasticity changes, boosted by  
478 dopaminergic medication. Compulsive overuse of sexual acts may lead to frequent  
479 engagement and overflow activity in pre-SMA-caudate connections, which could re-  
480 organize the local activity and white matter pathways<sup>72</sup>. Possibly, aberrant plasticity along  
481 this pathway may increase the vulnerability to develop PD+HS and other forms of  
482 addictive behaviours as well. Together with notions that the mesocorticolimbic circuitry  
483 is overstimulated in Parkinson's disease and ICD<sup>4</sup>, pre-SMA-caudate tract may be a  
484 susceptible pathway to drug-induced dopaminergic overstimulation and hypersexuality  
485 in Parkinson's disease. Hence, considering the well-known plasticity changes associated  
486 to reward cue-exposure<sup>90</sup>, our results are interpreted by a remodeling framework of  
487 inhibitory brain dynamics, possibly mediated by experience-dependent synaptic  
488 plasticity. This view would explain why some Parkinson's disease patients develop a  
489 particular form of ICD, coherent with founded notions of personality traits that influence  
490 generation of ICD in Parkinson's disease<sup>5,95</sup>. Yet, further information is needed to  
491 determine whether these neurobiological changes are causal or putative consequences of  
492 dopaminergic medication in PD+HS.

#### 493 **A route towards rehabilitation: neuromodulation to repair hypersexuality**

494 To date, hypersexuality counts with no direct validated treatment. With aim improving  
495 this deficient clinical scenario, we compared excitatory rTMS stimulation over the pre-  
496 SMA to a sham condition and found an acute benefit on response inhibition under sexual  
497 influence in PD+HS patients (**Figure 5B**). We favored stimulation of the pre-SMA based  
498 on 2 foundations: its dominant role in response inhibition<sup>20,23</sup> and our fMRI group-based  
499 findings showing pre-SMA causal downregulation in stop-related trials in PD+HS. Based  
500 on previous rTMS beneficial effects over response inhibition<sup>96-98</sup> and the excitability  
501 properties of intermittent theta burst stimulation over the pre-SMA while performing  
502 inhibitory tasks<sup>98</sup>, we assume our protocol enhanced pre-SMA inhibitory function.  
503 Similarly, changes in the connectivity between pre-SMA and caudate may explain the  
504 behavioural enhancement due to their direct functional connection in response inhibition

505 tasks<sup>91</sup>. Thus, intermittent theta burst stimulation may reset dysfunctional pre-SMA  
506 downstream pathways and induce distant control over limbic networks in PD+HS  
507 patients.

508 An alternative explanation of our neuromodulation findings is a possible variation on the  
509 emotional regulation associated to sexual cues. Previously, a single-blind, randomized  
510 crossover study investigated the impact of pre-SMA stimulation (online interference with  
511 5 pulses at 10Hz; sham-controlled) on a facial emotion recognition task<sup>99</sup>. After  
512 stimulation periods, a specific downregulation in happiness recognition was disrupted  
513 compared to sham<sup>99</sup>, suggestive of an influence on the rewarding system when  
514 stimulating the pre-SMA. In line with such findings, our protocol could have produced  
515 an impact on how sexual cues were identified in our patients and thus may have placed  
516 less constraints over response inhibition.

517 Recent evidence suggests the efficacy of rTMS in improving response inhibition in  
518 Parkinson's disease when applied over the dorsolateral prefrontal cortex<sup>100</sup>. Yet, to our  
519 best knowledge, no studies have targeted the pre-SMA with aim modifying cognitive  
520 control in Parkinson's disease with or without ICDs. Interestingly, however, pre-SMA  
521 stimulation (1Hz) improved Parkinson's disease-related dyskinesias<sup>101</sup> – involuntary  
522 movements induced by dopaminergic mediation – that might belong to a related  
523 continuum of the motor circuits. Hence, their results may parallel our findings as their  
524 stimulation protocol may have temporarily modified related pathophysiological  
525 mechanisms<sup>4</sup> as those speculated here and possibly may offer a common target to lessen  
526 dopaminergic side-effects.

### 527 **Strengths, limitations, and conclusions**

528 One strength of this study was using a highly selected clinical sample and ad-hoc stimuli  
529 to provoke PD+HS measured with multi-level neuroimaging tools. We then used a  
530 circuit-based approach to stimulate a putative brain target essential in PD+HS. Our  
531 findings are based on a moderate sample size that should be expanded in larger cohorts.  
532 Reasons for this sample size are directly related to the scientific question that requires to  
533 limit recruitment to a precise clinical characteristic (with added recruitment efforts). Yet,  
534 both studies follow adequate sample sizes based on previous neuroimaging<sup>10,38</sup> and rTMS  
535 studies on Parkinson's disease and ICD samples<sup>35</sup>. Moreover, our Bayesian sequential  
536 analysis suggests the accumulation of evidence in favor of the alternative hypothesis

537 increases relatively steep as subjects are tested toward strong and moderate evidence in  
538 study 1 and 2, respectively.

539 Stimulation of pre-SMA was conducted in PD+HS patients and not patients without the  
540 behavioural problem. Thus, this design constraint renders our results not specific to  
541 hypersexual issues. Yet, using sham-controlled stimulation (with ad-hoc sham rTMS  
542 equipment) provides specificity of the neuromodulation target and protocol. Moreover,  
543 given most Parkinson's disease patients without ICD have no associated non-motor  
544 symptoms directly associated with pre-SMA functions (executive functions, response  
545 inhibition, conflict resolution, etc.), ethical issues are applicable when testing stimulation  
546 protocols in patients without a primary motive.

## 547 **Conclusion**

548 Evidence for an incentive sensitization framework is provided to explain the interplay  
549 between desire enhancement and response inhibition in hypersexuality. We reveal a  
550 circuit-based route that deciphers the cortico-striatal anatomical and functional  
551 dysfunction and a candidate brain target for neuromodulation to change behavioural  
552 expression in patients with PD+HS.

## **Acknowledgements**

We are thankful for patients and their families for active engagement in the studies. We also are grateful to Federación de Parkinson for helping with advertising the study.

## **Funding**

Funding included Fundación Jesús de Gangoiti Barrera (DMM), AES-ISCIH-Miguel Servet (CP18/00038) and AES-ISCIH (PI19/00298) (IO) for execution of the project.

## Competing interests

Dr. Raúl Martínez-Fernández reports honoraria for lecturing from Zambon, Boston Scientific and Abbvie. All other authors report no biomedical financial interests or potential competing interests.

## Supplementary material

Supplementary material is available.

## References

1. Molina JA, Sáinz-Artiga MJ, Fraile A, et al. Pathologic gambling in Parkinson's disease: a behavioral manifestation of pharmacologic treatment? *Mov Disord.* 2000;15(5):869-872. doi:10.1002/1531-8257(200009)15:5<869::aid-mds1016>3.0.co;2-i
2. Weintraub D, Koester J, Potenza MN, et al. Impulse control disorders in Parkinson disease: A cross-sectional study of 3090 patients. *Arch Neurol.* 2010;67(5):589-595. doi:10.1001/archneurol.2010.65
3. Voon V, Gao J, Brezing C, et al. Dopamine agonists and risk: Impulse control disorders in Parkinson's; Disease. *Brain.* Published online 2011. doi:10.1093/brain/awr080
4. Voon V, Napier TC, Frank MJ, et al. Impulse control disorders and levodopa-induced dyskinesias in Parkinson's disease: an update. *Lancet Neurol.* 2017;16(3):238-250. doi:10.1016/S1474-4422(17)30004-2
5. Weintraub D, Claassen DO. Impulse Control and Related Disorders in Parkinson's Disease. In: *International Review of Neurobiology.* Vol 133. Academic Press Inc.; 2017:679-717. doi:10.1016/bs.irn.2017.04.006
6. Vriend C. The neurobiology of impulse control disorders in Parkinson's disease: from neurotransmitters to neural networks. *Cell Tissue Res.* 2018;373(1):327-336. doi:10.1007/s00441-017-2771-0
7. Goldstein RZ, Volkow ND. Dysfunction of the prefrontal cortex in addiction: neuroimaging findings and clinical implications. *Nat Rev Neurosci.* 2011;12(11):652-669. doi:10.1038/nrn3119
8. Napier TC, Corvol J-C, Grace AA, et al. Linking neuroscience with modern concepts of impulse control disorders in Parkinson's disease. *Mov Disord.* 2015;30(2):141-149. doi:10.1002/mds.26068
9. Djamshidian A, O'Sullivan SS, Wittmann BC, Lees AJ, Averbeck BB. Novelty seeking behaviour in Parkinson's disease. *Neuropsychologia.* Published online 2011. doi:10.1016/j.neuropsychologia.2011.04.026
10. Girard R, Obeso I, Thobois S, et al. Wait and you shall see: Sexual delay discounting in hypersexual Parkinson's disease. *Brain.* 2019;142(1):146-162. doi:10.1093/brain/awy298
11. Drew DS, Muhammed K, Baig F, et al. Dopamine and reward hypersensitivity in Parkinson's disease with impulse control disorder. *Brain.* 2020;143(8):2502-2518.



- doi:10.1093/brain/awaa198
12. Biundo R, Formento-Dojot P, Facchini S, et al. Brain volume changes in Parkinson's disease and their relationship with cognitive and behavioural abnormalities. *J Neurol Sci.* 2011;310(1-2):64-69. doi:10.1016/j.jns.2011.08.001
  13. Biundo R, Weis L, Facchini S, et al. Patterns of cortical thickness associated with impulse control disorders in Parkinson's disease. *Mov Disord.* 2015;30(5):688-695. doi:10.1002/mds.26154
  14. Tessitore A, Santangelo G, De Micco R, et al. Cortical thickness changes in patients with Parkinson's disease and impulse control disorders. *Park Relat Disord.* 2016;24:119-125. doi:10.1016/j.parkreldis.2015.10.013
  15. Piray P, Zeighami Y, Bahrami F, Eissa AM, Hewedi DH, Moustafa AA. Behavioral/Cognitive Impulse Control Disorders in Parkinson's Disease Are Associated with Dysfunction in Stimulus Valuation But Not Action Valuation. *J Neurosci.* 2014;34(23):7814-7824. doi:10.1523/JNEUROSCI.4063-13.2014
  16. Leplow B, Sepke M, Schönfeld R, et al. Impaired learning of punishments in Parkinson's disease with and without impulse control disorder. *J Neural Transm.* 2017;124(2):217-225. doi:10.1007/s00702-016-1648-9
  17. Martini A, Lago DD, Edelstyn NMJ, Grange JA, Tamburin S. Impulse control disorder in parkinson's disease: A meta-analysis of cognitive, affective, and motivational correlates. *Front Neurol.* 2018;9(AUG):654. doi:10.3389/fneur.2018.00654
  18. Housden CR, O'Sullivan SS, Joyce EM, Lees AJ, Roiser JP. Intact reward learning but elevated delay discounting in Parkinson's disease patients with impulsive-compulsive spectrum behaviors. *Neuropsychopharmacology.* 2010;35(11):2155-2164. doi:10.1038/npp.2010.84
  19. Voon V, Reynolds B, Brezing C, et al. Impulsive choice and response in dopamine agonist-related impulse control behaviors. *Psychopharmacology (Berl).* 2010;207(4):645-659. doi:10.1007/s00213-009-1697-y
  20. Aron AR, Behrens TE, Smith S, Frank MJ, Poldrack RA. Triangulating a Cognitive Control Network Using Diffusion-Weighted Magnetic Resonance Imaging (MRI) and Functional MRI. *J Neurosci.* 2007;27(14):3743-3752. doi:10.1523/JNEUROSCI.0519-07.2007
  21. Ray Li CS, Yan P, Sinha R, et al. Subcortical processes of motor response inhibition during a stop signal task. *Neuroimage.* 2008;41(4):1352-1363. doi:S1053-8119(08)00484-9 [pii] 10.1016/j.neuroimage.2008.04.023 [doi]
  22. Rae CL, Hughes LE, Anderson MC, Rowe JB. The prefrontal cortex achieves inhibitory control by facilitating subcortical motor pathway connectivity. *J Neurosci.* 2015;35(2):786-794. doi:10.1523/jneurosci.3093-13.2015
  23. Zhang R, Geng X, Lee TMC. Large-scale functional neural network correlates of response inhibition: an fMRI meta-analysis. *Brain Struct Funct.* 2017;222(9):3973-3990. doi:10.1007/s00429-017-1443-x
  24. Maizey L, Evans CJ, Muhlert N, Verbruggen F, Chambers CD, Allen CPG. Cortical and subcortical functional specificity associated with response inhibition. *Neuroimage.* 2020;220:117110. doi:10.1016/j.neuroimage.2020.117110
  25. van Eimeren T, Pellecchia G, Cilia R, et al. Drug-induced deactivation of inhibitory networks predicts pathological gambling in PD. *Neurology.* 2010;75(19):1711-1716. doi:10.1212/WNL.0b013e3181fc27fa
  26. Paz-Alonso PM, Navalpotro-Gomez I, Boddy P, et al. Functional inhibitory control dynamics in impulse control disorders in Parkinson's disease. *Mov Disord.* 2020;35(2):316-325. doi:10.1002/mds.27885

## Hypersexuality alters cognitive control

27. Leroi I, Barraclough M, McKie S, et al. Dopaminergic influences on executive function and impulsive behaviour in impulse control disorders in Parkinson's disease. *J Neuropsychol*. 2013;7(2):306-325. doi:10.1111/jnp.12026
28. Claassen DO, Van Den Wildenberg WPMM, Harrison MB, et al. Proficient motor impulse control in Parkinson disease patients with impulsive and compulsive behaviors. *Pharmacol Biochem Behav*. 2015;129:19-25. doi:10.1016/j.pbb.2014.11.017
29. Haagensen BN, Herz DM, Meder D, Madsen KH, Løkkegaard A, Siebner HR. Linking brain activity during sequential gambling to impulse control in Parkinson's disease. *NeuroImage Clin*. 2020;27(May):102330. doi:10.1016/j.nicl.2020.102330
30. Esteban-Peñalba T, Paz-Alonso PM, Navalpotro-Gómez I, Rodríguez-Oroz MC. Functional correlates of response inhibition in impulse control disorders in Parkinson's disease. *NeuroImage Clin*. 2021;32:102822. doi:10.1016/j.nicl.2021.102822
31. Menon V, Uddin LQ. Saliency, switching, attention and control: a network model of insula function. *Brain Struct Funct*. 2010;214(5-6):655-667. doi:10.1007/S00429-010-0262-0
32. Mata-Marín D, Pineda-Pardo JÁ, Molina JA, Alonso-Frech F, Vela L, Obeso I. Aberrant salient and corticolimbic connectivity in hypersexual Parkinson's disease. *Brain Connect*. Published online April 3, 2021. doi:10.1089/brain.2020.0868
33. Verbruggen F, De Houwer J. Do emotional stimuli interfere with response inhibition? Evidence from the stop signal paradigm. *Cogn Emot*. 2007;21(2):391-403. doi:10.1080/02699930600625081
34. Pessoa L, Padmala S, Kenzer A, Bauer A. Interactions between cognition and emotion during response inhibition. *Emotion*. 2012;12(1):192-197. doi:10.1037/a0024109
35. Nardone R, De Blasi P, Höller Y, et al. Repetitive transcranial magnetic stimulation transiently reduces punning in Parkinson's disease: A preliminary study. *J Neural Transm*. Published online 2014. doi:10.1007/s00702-013-1100-3
36. Sverak T, Linhartova P, Fiala A, Kasperek T. Repetitive Transcranial Magnetic Stimulation Treating Impulsivity in Borderline Personality Disorder and Attention Deficit/Hyperactivity Disorder. In: *Transcranial Magnetic Stimulation in Neuropsychiatry*. InTech; 2018. doi:10.5772/intechopen.72787
37. Yang CC, Völlm B, Khalifa N. The Effects of rTMS on Impulsivity in Normal Adults: a Systematic Review and Meta-Analysis. *Neuropsychol Rev*. 2018;28(3):377-392. doi:10.1007/s11065-018-9376-6
38. Politis M, Loane C, Wu K, et al. Neural response to visual sexual cues in dopamine treatment-linked hypersexuality in Parkinson's disease. *Brain*. 2013;136(2):400-411. doi:10.1093/brain/aws326
39. Prévost C, Pessiglione M, Météreau E, et al. Separate valuation subsystems for delay and effort decision costs. *J Neurosci*. 2010;30(42):14080-14090. doi:10.1523/JNEUROSCI.2752-10.2010
40. Verbruggen F, Aron AR, Band GPH, et al. A consensus guide to capturing the ability to inhibit actions and impulsive behaviors in the stop-signal task. *Elife*. 2019;8. doi:10.7554/eLife.46323
41. Nasreddine ZS, Phillips NA, Bédirian V, et al. The Montreal Cognitive Assessment, MoCA: A brief screening tool for mild cognitive impairment. *J Am Geriatr Soc*. Published online 2005. doi:10.1111/j.1532-5415.2005.53221.x

42. Weschler D. Wechsler Adult Intelligence Scale - Fourth Edition. *Stat Solut*. Published online 2008. doi:10.1080/00268978500101581
43. Patton JH, Stanford MS, Barratt ES. Factor structure of the Barratt impulsiveness scale. *J Clin Psychol*. 1995;51(6):768-774. <http://www.ncbi.nlm.nih.gov/pubmed/8778124>
44. Yesavage JA, Brink TL, Rose TL, et al. Development and validation of a geriatric depression screening scale: A preliminary report. *J Psychiatr Res*. 1982;17(1):37-49. doi:10.1016/0022-3956(82)90033-4
45. Starkstein SE, Mayberg HS, Preziosi TJ, Andrezejewski P, Leiguarda R, Robinson RG. Reliability, validity, and clinical correlates of apathy in Parkinson's disease. *J Neuropsychiatry Clin Neurosci*. 1992;4(2):134-139. doi:10.1176/JNP.4.2.134
46. Beck AT, Epstein N, Brown G, Steer RA. An Inventory for Measuring Clinical Anxiety: Psychometric Properties. *J Consult Clin Psychol*. 1988;56(6):893-897. doi:10.1037/0022-006X.56.6.893
47. Mykletun A, Dahl AA, O'Leary MP, Fosså SD. Assessment of male sexual function by the Brief Sexual Function Inventory. *BJU Int*. 2006;97(2):316-323. doi:10.1111/j.1464-410X.2005.05904.x
48. Ashburner J, Friston KJ. Unified segmentation. *Neuroimage*. 2005;26(3):839-851. doi:10.1016/j.neuroimage.2005.02.018
49. Ashburner J. A fast diffeomorphic image registration algorithm. *Neuroimage*. Published online 2007. doi:10.1016/j.neuroimage.2007.07.007
50. Friston KJ, Harrison L, Penny W. Dynamic causal modelling. *Hum Brain Funct Second Ed*. 2003;19:1273-1302. doi:10.1016/B978-012264841-0/50054-8
51. Picard N, Strick PL. Motor areas of the medial wall: A review of their location and functional activation. *Cereb Cortex*. 1996;6(3):342-353. doi:10.1093/cercor/6.3.342
52. Inase M, Tokuno H, Nambu A, Akazawa T, Takada M. Corticostriatal and corticosubthalamic input zones from the presupplementary motor area in the macaque monkey: Comparison with the input zones from the supplementary motor area. *Brain Res*. 1999;833(2):191-201. doi:10.1016/S0006-8993(99)01531-0
53. Jahfari S, Waldorp L, van den Wildenberg WPM, Scholte HS, Ridderinkhof KR, Forstmann BU. Effective connectivity reveals important roles for both the hyperdirect (fronto-subthalamic) and the indirect (fronto-striatal-pallidal) fronto-basal ganglia pathways during response inhibition. *J Neurosci*. 2011;31(18):6891-6899. doi:10.1523/JNEUROSCI.5253-10.2011
54. Robinson PA. Interrelating anatomical, effective, and functional brain connectivity using propagators and neural field theory. *Phys Rev E - Stat Nonlinear, Soft Matter Phys*. 2012;85(1):011912. doi:10.1103/PhysRevE.85.011912
55. Beier KT, Steinberg EE, Deloach KE, et al. Circuit Architecture of VTA Dopamine Neurons Revealed by Systematic Input-Output Mapping. *Cell*. 2015;162(3):622-634. doi:10.1016/j.cell.2015.07.015
56. Macfarlane MD, Jakabek D, Walterfang M, et al. Striatal Atrophy in the Behavioural Variant of Frontotemporal Dementia: Correlation with Diagnosis, Negative Symptoms and Disease Severity. *PLoS One*. 2015;10(6). doi:10.1371/journal.pone.0129692
57. Neubert FX, Mars RB, Sallet J, Rushworth MFS. Connectivity reveals relationship of brain areas for reward-guided learning and decision making in human and monkey frontal cortex. *Proc Natl Acad Sci U S A*. 2015;112(20):E2695-E2704. doi:10.1073/pnas.1410767112
58. Elston TW, Bilkey DK. Anterior Cingulate Cortex Modulation of the Ventral

- Tegmental Area in an Effort Task. *Cell Rep.* 2017;19(11):2220-2230. doi:10.1016/j.celrep.2017.05.062
59. Stephan KE, Penny WD, Daunizeau J, Moran RJ, Friston KJ. Bayesian model selection for group studies. *Neuroimage.* 2009;46(4):1004-1017. doi:10.1016/j.neuroimage.2009.03.025
  60. Gorgolewski K, Burns CD, Madison C, et al. Nipype: A Flexible, Lightweight and Extensible Neuroimaging Data Processing Framework in Python. *Front Neuroinform.* 2011;5:13. doi:10.3389/fninf.2011.00013
  61. Esteban O, Ciric R, Finc K, et al. Analysis of task-based functional MRI data preprocessed with fMRIPrep. *Nat Protoc.* 2020;15(7):2186. doi:10.1038/S41596-020-0327-3
  62. Zhang H, Yushkevich PA, Alexander DC, Gee JC. Deformable registration of diffusion tensor MR images with explicit orientation optimization. *Med Image Anal.* 2006;10(5):764-785. doi:10.1016/j.media.2006.06.004
  63. Wang R, Benner T, Sorensen AG, Wedeen VJ. Diffusion Toolkit: A Software Package for Diffusion Imaging Data Processing and Tractography. *Proc Intl Soc Mag Reson Med.* 2007;15:3720.
  64. Yeatman JD, Dougherty RF, Myall NJ, Wandell BA, Feldman HM. Tract profiles of white matter properties: automating fiber-tract quantification. *PLoS One.* 2012;7(11). doi:10.1371/JOURNAL.PONE.0049790
  65. PTSA. GitHub - pennmem/ptsa\_new: PTSA - Python Time Series Analysis. Published online 2017.
  66. Gramfort A. MEG and EEG data analysis with MNE-Python. *Front Neurosci.* 2013;7(7 DEC):267. doi:10.3389/fnins.2013.00267
  67. Huang YZ, Edwards MJ, Rounis E, Bhatia KP, Rothwell JC. Theta burst stimulation of the human motor cortex. *Neuron.* 2005;45(2):201-206. doi:10.1016/j.neuron.2004.12.033
  68. Stokes MG, Chambers CD, Gould IC, et al. Distance-adjusted motor threshold for transcranial magnetic stimulation. *Clin Neurophysiol.* 2007;118(7):1617-1625. doi:10.1016/j.clinph.2007.04.004
  69. JASP Team. JASP (version 0.9.2)[Computer Software]. Published online 2021.
  70. Bissett PG, Hagen MP, Jones HM, Poldrack RA. Design issues and solutions for stop-signal data from the adolescent brain cognitive development (Abcd) study. *Elife.* 2021;10. doi:10.7554/eLife.60185
  71. Baudrexel S, Witte T, Seifried C, et al. Resting state fMRI reveals increased subthalamic nucleus-motor cortex connectivity in Parkinson's disease. *Neuroimage.* 2011;55(4):1728-1738. doi:10.1016/j.neuroimage.2011.01.017
  72. Yoo H Bin, Lee JY, Lee JS, et al. Whole-brain diffusion-tensor changes in parkinsonian patients with impulse control disorders. *J Clin Neurol.* Published online 2015. doi:10.3988/jcn.2015.11.1.42
  73. Manohar SG, Husain M. Reduced pupillary reward sensitivity in Parkinson's disease. *npj Park Dis.* 2015;1(1):1-4. doi:10.1038/npjparkd.2015.26
  74. Manohar SG, Chong TTJ, Apps MAJ, et al. Reward Pays the Cost of Noise Reduction in Motor and Cognitive Control. *Curr Biol.* 2015;25(13):1707-1716. doi:10.1016/j.cub.2015.05.038
  75. Robinson TE, Berridge KC. Incentive-sensitization and addiction. *Addiction.* 2001;96(1):103-114. doi:10.1080/09652140020016996
  76. Zilverstand A, Huang AS, Alia-Klein N, Goldstein RZ. Neuroimaging Impaired Response Inhibition and Salience Attribution in Human Drug Addiction: A Systematic Review. *Neuron.* 2018;98(5):886-903.

- doi:10.1016/j.neuron.2018.03.048
77. Patterson TK, Lenartowicz A, Berkman ET, Ji D, Poldrack RA, Knowlton BJ. Putting the brakes on the brakes: negative emotion disrupts cognitive control network functioning and alters subsequent stopping ability. *Exp Brain Res*. 2016;234(11):3107-3118. doi:10.1007/s00221-016-4709-2
  78. Arnow BA, Desmond JE, Banner LL, et al. Brain activation and sexual arousal in healthy, heterosexual males. *Brain*. 2002;125(5):1014-1023. doi:10.1093/brain/awf108
  79. Hamann S, Herman RA, Nolan CL, Wallen K. Men and women differ in amygdala response to visual sexual stimuli. *Nat Neurosci*. 2004;7(4):411-416. doi:10.1038/nn1208
  80. Walter M, Bermpohl F, Mouras H, et al. Distinguishing specific sexual and general emotional effects in fMRI-Subcortical and cortical arousal during erotic picture viewing. Published online 2008. doi:10.1016/j.neuroimage.2008.01.040
  81. Cera N, Di Pierro ED, Sepede G, et al. The Role of Left Superior Parietal Lobe in Male Sexual Behavior: Dynamics of Distinct Components Revealed by fMRIj sm\_2719 1602..1612. *J Sex Med*. 2012;9:1602-1612. doi:10.1111/j.1743-6109.2012.02719.x
  82. Leon-Carrion J, Martín-Rodríguez JF, Damas-López J, et al. Does dorsolateral prefrontal cortex (DLPFC) activation return to baseline when sexual stimuli cease? The role of DLPFC in visual sexual stimulation. *Neurosci Lett*. 2007;416(1):55-60. doi:10.1016/j.neulet.2007.01.058
  83. Rodriguez-Nieto G, Sack AT, Dewitte M, Emmerling F, Schuhmann T. Putting out the blaze: The neural mechanisms underlying sexual inhibition. *PLoS One*. 2019;14(1):1-21. doi:10.1371/journal.pone.0208809
  84. Seok J-W, Sohn J-H. Response inhibition during processing of sexual stimuli in males with problematic hypersexual behavior. *J Behav Addict*. 2020;9(1). doi:10.1556/2006.2020.00003
  85. Reuter J, Raedler T, Rose M, Hand I, Gläscher J, Büchel C. Pathological gambling is linked to reduced activation of the mesolimbic reward system. *Nat Neurosci*. 2005;8(2):147-148. doi:10.1038/nn1378
  86. Yau YHC, Leeman RF, Potenza MN. Biological Underpinning of Behavioural Addictions and Management Implications. In: *Textbook of Addiction Treatment: International Perspectives*. Springer Milan; 2015:1411-1442. doi:10.1007/978-88-470-5322-9\_71
  87. Berridge KC, Robinson TE. Parsing reward. *Trends Neurosci*. 2003;26(9):507-513. doi:10.1016/S0166-2236(03)00233-9
  88. Georgiadis JR, Kringelbach ML. The human sexual response cycle: Brain imaging evidence linking sex to other pleasures. *Prog Neurobiol*. 2012;98(1):49-81. doi:10.1016/j.pneurobio.2012.05.004
  89. Bancroft J, Janssen E. The dual control model of male sexual response: A theoretical approach to centrally mediated erectile dysfunction. *Neurosci Biobehav Rev*. 2000;24(5):571-579. doi:10.1016/S0149-7634(00)00024-5
  90. Ostroumov A, Dani JA. Inhibitory Plasticity of Mesocorticolimbic Circuits in Addiction and Mental Illness. *Trends Neurosci*. 2018;41(12):898-910. doi:10.1016/j.tins.2018.07.014
  91. Duann J-RR, Ide JS, Luo X, Li CSR. Functional connectivity delineates distinct roles of the inferior frontal cortex and presupplementary motor area in stop signal inhibition. *J Neurosci*. 2009;29(32):10171-10179. doi:29/32/10171 [pii]10.1523/JNEUROSCI.1300-09.2009 [doi]

92. Schmidt CC, Timpert DC, Arend I, et al. Control of response interference: caudate nucleus contributes to selective inhibition. *Sci Rep.* 2020;10(1):1-15. doi:10.1038/s41598-020-77744-1
93. Chen N-K, Chou Y-H, Sundman M, et al. Alteration of Diffusion-Tensor Magnetic Resonance Imaging Measures in Brain Regions Involved in Early Stages of Parkinson's Disease. *Brain Connect.* 2018;8(6):343-349. doi:10.1089/brain.2017.0558
94. Sparks H, Riskin-Jones H, Price C, et al. Impulsivity Relates to Relative Preservation of Mesolimbic Connectivity in Patients with Parkinson Disease. *NeuroImage Clin.* 2020;27:102259. doi:10.1016/j.nicl.2020.102259
95. McDonald KR, Chilman E, Barraclough M, Elliott R, Leroi I. Personality Style in Behavioural Disturbances in Parkinson's Disease. *J Neurol Neurophysiol.* 2014;05(06). doi:10.4172/2155-9562.1000251
96. Obeso I, Cho SS, Antonelli F, et al. Stimulation of the pre-SMA influences cerebral blood flow in frontal areas involved with inhibitory control of action. *Brain Stimul.* Published online 2013. doi:10.1016/j.brs.2013.02.002
97. Zandbelt BB, Bloemendaal M, Hoogendam JM, Kahn RS, Vink M. Transcranial Magnetic Stimulation and Functional MRI Reveal Cortical and Subcortical Interactions during Stop-signal Response Inhibition. *J Cogn Neurosci.* 2013;25(2):157-174. doi:10.1162/jocn\_a\_00309
98. Watanabe T, Hanajima R, Shirota Y, et al. Effects of rTMS of pre-supplementary motor area on fronto basal ganglia network activity during stop-signal task. *J Neurosci.* 2015;35(12):4813-4823. doi:10.1523/JNEUROSCI.3761-14.2015
99. Rochas V, Gelmini L, Krolak-Salmon P, et al. Disrupting pre-SMA activity impairs facial happiness recognition: An event-related TMS study. *Cereb Cortex.* 2013;23(7):1517-1525. doi:10.1093/cercor/bhs133
100. Jiang Y, Guo Z, McClure MA, He L, Mu Q. Effect of rTMS on Parkinson's cognitive function: a systematic review and meta-analysis. *BMC Neurol.* 2020;20(1):1-14. doi:10.1186/s12883-020-01953-4
101. Lohse A, Meder D, Nielsen S, et al. Low-frequency transcranial stimulation of pre-supplementary motor area alleviates levodopa-induced dyskinesia in Parkinson's disease: a randomized cross-over trial. *Brain Commun.* 2020;2(2). doi:10.1093/BRAINCOMMS/FCAA147

## Supplementary Material

### A circuit-based approach to repair hypersexuality in Parkinson's disease

David Mata-Marín<sup>1,2,6\*</sup>, José A. Pineda-Pardo<sup>1,2\*</sup>, Mario Michiels<sup>1,2,6</sup>, Cristina Pagge<sup>1,2,6</sup>, Claudia Ammann<sup>1,2</sup>, Raúl Martínez-Fernández<sup>1,2</sup>, José Antonio Molina<sup>3</sup>, Lydia Vela<sup>4</sup>, Fernando Alonso-Frech<sup>5</sup>, Ignacio Obeso<sup>1,2</sup>

\*Co-first authors

#### Author affiliations:

1 HM CINAC. Centro Integral de Neurociencias AC. HM Puerta del Sur. HM Hospitales. Móstoles, Madrid, Spain.

2 Network Center for Biomedical Research on Neurodegenerative Diseases (CIBERNED), Instituto Carlos III, Madrid, Spain.

3 Hospital 12 de Octubre, Madrid, Spain.

4 Hospital Fundación Alcorcón, Madrid, Spain.

5 Hospital Clínico San Carlos, Madrid, Spain.

6 PhD program in Neuroscience, Autonoma de Madrid University, 28029 Madrid, Spain.

**Correspondence to:** Dr. Ignacio Obeso.

Avda. Carlos V, 70 Móstoles, 28938, Madrid, Spain.

[iobeso.hmcinac@hmhospitales.com](mailto:iobeso.hmcinac@hmhospitales.com)

[www.controlandhabit.com](http://www.controlandhabit.com)

**Running title:** Hypersexuality alters cognitive control.

## 553 **Methods**

### 554 **The erotic stop-signal task**

555 Following the recommendations for using the stop signal paradigm<sup>1</sup>, we first evaluated  
556 the independence of the go and stop processes by: a) correlations between StopRespond  
557 reaction times (RTs) and correct go trials of each stimuli condition (erotic and non-erotic)  
558 per participant; b) correlations between the go trials and stop signal reaction time (SSRT);  
559 and c) plotting cumulative distributions of Go and StopRespond RTs (**Figure 1C, 5A**).  
560 Bonferroni correction for multiple comparisons were used in *post-hoc* tests and specified  
561 when tests did not survive corrections.

### 562 **Dynamic causal modelling (DCM)**

563 DCM estimates the effective connectivity between brain regions according to (i) average  
564 connections between regions (DCM.A), (ii) modulatory task influence on connections  
565 (erotic images and Stop-Inhibit in erotic trials, see **Figure 3A**; DCM.B) and (iii)  
566 condition-specific inputs that drive network activity (namely regional engagement in a  
567 Stop-Inhibit task; DCM.C). Across all 13 models, driving inputs (DCM.C) represented 2  
568 key elements of the task: erotic images and Stop-Inhibit tasks. This was set to both ACC  
569 and pre-SMA areas (**Figure S1**). Bayesian parameter averaging and was used to estimate  
570 the connectivity values of the most likely model at the group level<sup>2</sup>.

### 571 **DWI acquisition and preprocessing steps**

572 Marchenko-Pastur distribution principal component analysis (MP-PCA) denoising  
573 following MRtrix3's *dwidenoise*<sup>3</sup> was applied with a 5-voxel window. After MP-PCA,  
574 B1 field inhomogeneity was corrected using *dwibiascorrect* from MRtrix3 with the N4  
575 algorithm<sup>4</sup>. After B1 bias correction, the mean intensity of the DWI series was adjusted



## Hypersexuality alters cognitive control

576 so all the mean intensity of the  $b=0$  images matched across each separate DWI scanning  
577 sequence. FSL (version 6.0.3:b862cdd5) eddy was used for head motion correction and  
578 Eddy current correction<sup>5</sup>. Eddy was configured with a  $q$ -space smoothing factor of 10, a  
579 total of 5 iterations, and 1000 voxels used to estimate hyperparameters. A linear first level  
580 model and a linear second level model were used to characterize Eddy current-related  
581 spatial distortion.  $q$ -space coordinates were forcefully assigned to shells. Field offset was  
582 attempted to be separated from subject movement. Shells were aligned post-eddy. Eddy's  
583 outlier replacement was run<sup>6</sup>. Data were grouped by slice, only including values from  
584 slices determined to contain at least 250 intracerebral voxels. Groups deviating by more  
585 than 4 standard deviations from the prediction had their data replaced with imputed  
586 values.  $b=0$  reference image was collected with reversed phase-encode blips, resulting in  
587 a pair of images with distortions going in opposite directions. Here,  $b=0$  images with  
588 reversed phase encoding directions were used along with an equal number of  $b=0$  images  
589 extracted from the DWI scans. From these pairs the susceptibility-induced off-resonance  
590 field was estimated<sup>7</sup>. The fieldmaps were ultimately incorporated into the Eddy current  
591 and head motion correction interpolation. Final interpolation was performed using the jac  
592 method.

593 Several confounding time-series were calculated based on the preprocessed DWI:  
594 framewise displacement (FD) using the implementation in *Nipype* (following the  
595 definitions by Power *et al.*<sup>8</sup>) The head-motion estimates calculated in the correction step  
596 were also placed within the corresponding confounds file. Slice-wise cross correlation  
597 was also calculated. The DWI time-series were resampled to ACPC, generating a  
598 preprocessed DWI run in ACPC space with 1.2mm isotropic voxels. Several internal  
599 operations of *QSIprep* use *Nilearn* 0.7.0<sup>9</sup> (RRID:SCR\_001362) and *Dipy*<sup>10</sup>.

## 600 **Tract selection**

601 We ran the default fiber tracking algorithm using DsiStudio<sup>11</sup> with 1000000 seeds to  
602 select the tracts of interest (HCP1065 atlas). Based on the DCM results, we selected ROIs  
603 extracted from the AAL\_2mm atlas (except for VTA: AAL\_1mm) and the pre-SMA  
604 (HMAT 2mm atlas)<sup>12</sup>. Tracts were obtained by setting the first region as seed (e.g.,  
605 caudate) and the end region as end (e.g., pre-SMA). However, the right caudate to ACC  
606 tract were both set as ROI to obtain a higher number of streamlines.

607 Then, streamlines were cut to avoid limiting access into the seed region. Finally, we  
608 deleted residual short tracts produced by cutting the tracts outside the seed region by  
609 setting the threshold to 10mm. For left caudate-ACC, we additionally deleted repeated  
610 tracts using the corresponding DsiStudio function (*voxel threshold* = 1). For right VTA-  
611 caudate, the straight streamline was removed since the tracking algorithm was not able to  
612 recognize the tracts streamlines from one of the hemispheres.

613 These bundles were used as a reference to extract the corresponding bundles from each  
614 subject. For this, we set to 20 the number of points to define each streamline and then we  
615 ran the recoBundles method implemented by Dipy with the default options.

## 616 **Results**

### 617 **Behavioural results**

618 While  $p(\text{inhib})$  did not significantly differ between groups [ $F^2s > 1$ ], it varied from 50%  
619 (Table S1) thus using the integration SSRT method is recommended<sup>1</sup>. Moreover,  
620 probability distributions were faster for StopRespond RT compared to go trials in every  
621 group [Kolmogorov-Smirnov:  $p's > .05$ ; except for PD-HS off medication  $p = .06$ ; **Figure**

622 **1C**]. Last, independence between going and stopping on erotic trials was confirmed with  
623 non-significant correlations between both measures (go and SSRT) across groups  
624 [ $p$ 's>.05,  $r$ 's>.4]. The faster StopRespond RT compared to Go RT independence between  
625 go and stop are all in line with a race model of action cancellation. Mean stop signal delay  
626 (SSD) across groups did not vary significantly between groups nor between conditions  
627 (**Table S1**).

628 Response initiation assessed by Go trials revealed an effect of condition [ $F_{(2,44)}=7.59$ ,  
629  $p=.009$ ] and condition x group interaction [ $F_{(2,44)}=4.45$ ,  $p=.017$ ] were found. Post-hoc  
630 comparisons on Go RTs did not survive Bonferroni corrections. The length of SSD was  
631 not different across groups, nor it revealed significant interactions [ $F$ 's>1].

632 Sexual influence over response inhibition (SSRT) was highly dependent on medication,  
633 group and condition (group [ $F_{(2,44)}=7.07$ ,  $p=.002$ ]; medication x group [ $F_{(2,44)}=5.92$ ,  $p$   
634  $=.006$ ]; medication x condition [ $F_{(2,40)}=8.25$ ,  $p=.006$ ]; medication x group x condition  
635 [ $F_{(2,40)}=5.96$ ,  $p=.005$ ]). Specifically, faster SSRT in erotic trials were seen in PD+HS  
636 compared to PD-HS both in on [ $t_{(27)}=-3.25$ ,  $p=.003$ ] and off medications [**Table S1**,  $t_{(27)}=-$   
637  $8.72$ ,  $p<.001$ ]. Similar differences were present between patients groups in non-erotic  
638 conditions while on [ $t_{(27)}=-3.72$ ,  $p=.001$ ] and off medications [**Table S1**,  $t_{(27)}=-6.57$ ,  
639  $p<.001$ ]. The group effects were marked by faster SSRT (erotic condition) in PD+HS (off  
640 medicated) compared to PD-HS [*on*:  $t_{(27)}=-3.25$ ,  $p=.003$ ; *off*:  $t_{(27)}=-8.72$ ,  $p<.001$ ] and  
641 controls [**Table S1**,  $t_{(28)}=-2.38$ ,  $p=.02$ ]. In contrast, PD-HS showed slower inhibition in  
642 both erotic and non-erotic conditions compared to controls [**Table S1**,  $t$ 's>2.1;  $p$ 's<.3].  
643 Medication effects across conditions revealed an specific worsening of inhibition in  
644 PD+HS patients while on compared to off medication [**Table S1**,  $t_{(12)}=-3.06$ ,  $p=.01$ ], an  
645 effect not seen in the non-erotic condition [**Table S1**,  $t$ 's<.1;  $p<.8$ ]. Error rates were not  
646 significantly different across groups, medication, or condition [ $z$ 's<1]. Significant

647 difference in response adaptation on the response delay effect (RDE) was seen (Go erotic  
648 minus Go non-erotic RTs) in the PD+HS group between medication states [*on*:  $-.22 \pm 11.9$ ;  
649 *off*:  $13.87 \pm 17.48$ ;  $p < .03$ ], while non-significant in the PD-HS group [*on*:  $-5.40 \pm 2.3$ ; *off*:  
650  $0.84 \pm 14.44$ ;  $p < .35$ ].

## 651 **Classic stop signal task**

652 To determine whether impulsive actions were associated only to presence of erotic  
653 stimuli, we assessed performance on a classic stop signal task (without presence of erotic  
654 images). Patients and controls probabilities of inhibition were not close to 50% although  
655 no significant differences were found between groups [ $F_{(2,44)} = .31$ ,  $p = .73$ ]. The SSRT  
656 showed significant differences between groups [ $F_{(2,44)} = 7.13$ ,  $p = .002$ ], whereby post-hoc  
657 tests result in prolonged SSRT in the PD-HS group compared to PD+HS patients [ $t_{(28)} =$   
658  $3.07$ ,  $p = .005$ ] and controls [ $t_{(28)} = 3.07$ ,  $p = .001$ ]. The remaining variables on the classic  
659 stop signal task showed non-significant differences between the groups.

## 660 **fMRI results**

### 661 **Neural Network for successful inhibition under erotic influence**

662 To eliminate confounding factors of the motor response embedded within inhibition of  
663 ongoing actions, Stop-Inhibit vs. Go trials were compared showing a main Group effect,  
664 with significant clusters over the motor cortex and cerebellum (**Table S2**). Such effect  
665 was driven by the PD-HS group showing greater ACC activity than PD+HS hypersexual  
666 patients (off medication; **Table S2**).

667 **Non-invasive brain stimulation: aiming to restore hypersexual**

668 **behaviour**

669 Probability of inhibition substantially deviated from 50% in both real and sham (~70%;  
670 **Table S5**), thus we used the integrative approach to estimate SSRT values No significant  
671 differences in SSD were observed in any type of stimuli after either condition (**Table S5**).  
672 Although not statistically significant, after real intermittent theta burst stimulation  
673 (compared to sham) patients produced less premature errors – anticipations during the  
674 sexual cue– in both erotic and non-erotic stimuli and tended to produce faster RTs in go  
675 trials (**Table S5**). Analyses were repeated comparing first vs. second sessions  
676 (independently of stimulation condition) to control for potential undesired order effects.  
677 No significant order effect was observed for any of the task variables including SSRT  
678 [ $F$ 's>1]. No significant difference in response adaptation on the response delay effect  
679 ( $RDE$ : Go erotic minus Go non-erotic RTs) was seen in any condition [ $real$ : 12.01±21.08;  
680  $sham$ : 9.42±17.48;  $p$ =.90].

## Supplementary references

1. Verbruggen F, Aron AR, Band GPH, et al. A consensus guide to capturing the ability to inhibit actions and impulsive behaviors in the stop-signal task. *Elife*. 2019;8. doi:10.7554/eLife.46323
2. Stephan KE, Penny WD, Daunizeau J, Moran RJ, Friston KJ. Bayesian model selection for group studies. *Neuroimage*. 2009;46(4):1004-1017. doi:10.1016/j.neuroimage.2009.03.025
3. Veraart J, Novikov DS, Christiaens D, Ades-aron B, Sijbers J, Fieremans E. Denoising of diffusion MRI using random matrix theory. *Neuroimage*. 2016;142:394-406. doi:10.1016/j.neuroimage.2016.08.016
4. Tustison NJ, Avants BB, Cook PA, et al. N4ITK: Improved N3 bias correction. *IEEE Trans Med Imaging*. 2010;29(6):1310-1320. doi:10.1109/TMI.2010.2046908
5. Andersson JLR, Sotiropoulos SN. An integrated approach to correction for off-resonance effects and subject movement in diffusion MR imaging. *Neuroimage*. 2016;125:1063-1078. doi:10.1016/j.neuroimage.2015.10.019

## Hypersexuality alters cognitive control

6. Andersson JLR, Graham MS, Zsoldos E, Sotiropoulos SN. Incorporating outlier detection and replacement into a non-parametric framework for movement and distortion correction of diffusion MR images. *Neuroimage*. 2016;141:556-572. doi:10.1016/j.neuroimage.2016.06.058
7. Andersson JLR, Skare S, Ashburner J. How to correct susceptibility distortions in spin-echo echo-planar images: Application to diffusion tensor imaging. *Neuroimage*. 2003;20(2):870-888. doi:10.1016/S1053-8119(03)00336-7
8. Power JD, Mitra A, Laumann TO, Snyder AZ, Schlaggar BL, Petersen SE. Methods to detect, characterize, and remove motion artifact in resting state fMRI. *Neuroimage*. 2014;84:320-341. doi:10.1016/j.neuroimage.2013.08.048
9. Abraham A, Pedregosa F, Eickenberg M, et al. Machine learning for neuroimaging with scikit-learn. *Front Neuroinform*. 2014;8(FEB):1-10. doi:10.3389/fninf.2014.00014
10. Garyfallidis E, Brett M, Amirbekian B, et al. Dipy, a library for the analysis of diffusion MRI data. *Front Neuroinform*. 2014;8:8.
11. Yeh F. DSI Studio. Published online June 2021. doi:10.5281/ZENODO.4978980
12. Mayka MA, Corcos DM, Leurgans SE, Vaillancourt DE. Three-dimensional locations and boundaries of motor and premotor cortices as defined by functional brain imaging: A meta-analysis. *Neuroimage*. 2006;31(4):1453-1474. doi:10.1016/j.neuroimage.2006.02.004

## Supplementary Tables

**Table S1 Erotic stop signal reaction time results per Medication and Group conditions.**

|                               | PD+HS<br>ON  | PD+HS<br>OFF | PD-HS<br>ON  | PD-HS<br>OFF | Controls     |
|-------------------------------|--------------|--------------|--------------|--------------|--------------|
| <b>Erotic</b>                 |              |              |              |              |              |
| Go RT <sup>a</sup> (ms)       | 643.11±191.5 | 627.10±131.9 | 628.31±108.0 | 619.38±151.0 | 525.29±79.6  |
| StopRespond RT (ms)           | 327.35±154.3 | 288.96±144.1 | 285.42±169.9 | 27.63±131.1  | 176.84±39.8  |
| p(stop)% <sup>b</sup>         | 64.03±17.4   | 66.11±9.2    | 66.72±16.6   | 69.30±17.0   | 69.54±13.8   |
| SSD <sup>c</sup> (ms)         | 232.92±108.6 | 277.65±117.2 | 251.93±121.2 | 243.59±133.7 | 251.57±97.1  |
| SSRT <sup>d</sup> (ms)        | 385.78±101.4 | 29.98±92.9   | 557.40±171.4 | 667.55±132.1 | 418.48±179.9 |
| ZRFT <sup>e</sup> (ms)        | 0.06±0.4     | 0.22±0.4     | -0.60±0.6    | -1.20±0.4    | -0.87±0.6    |
| Discrimination errors (total) | 2.07±1.2     | 2.86±3.3     | 2.73±4.1     | 2.93±3.6     | 2.44±5.8     |
| Premature errors              | 0.64±1.6     | 0.43±0.9     | 0.20±0.5     | 0.0±0.0      | 0.13±0.3     |
| <b>Non-Erotic</b>             |              |              |              |              |              |
| Go RT <sup>a</sup> (ms)       | 642.89±187.3 | 64.98±125.2  | 622.90±101.5 | 62.23±152.1  | 538.42±8.4   |
| StopRespond RT (ms)           | 329.78±154.0 | 282.08±152.9 | 271.13±171.1 | 265.37±135.1 | 18.30±49.4   |
| p(stop)% <sup>b</sup>         | 65.21±15.1   | 67.85±14.0   | 69.36±17.9   | 69.86±17.4   | 69.05±15.7   |
| SSD <sup>c</sup> (ms)         | 231.49±112.6 | 279.49±116.4 | 251.95±12.9  | 246.93±132.0 | 251.63±96.3  |
| SSRT <sup>d</sup> (ms)        | 381.78±122.0 | 38.79±72.6   | 559.37±134.1 | 677.71±152.6 | 445.42±159.9 |
| ZRFT <sup>e</sup> (ms)        | 0.08±0.5     | -0.08±0.3    | -0.70±0.6    | -1.12±0.4    | -0.94±1.7    |
| Discrimination errors (total) | 2.50±1.99    | 2.36±3.2     | 1.93±2.2     | 2.71±4.5     | 2.19±7.6     |
| Premature errors              | 0.29±0.8     | 0.14±0.3     | 0.0±0.0      | 0.0±0.0      | 0.13±0.3     |

<sup>a</sup>RT = reaction time; <sup>b</sup>p(stop)% = % probability of stopping; <sup>c</sup>SSD = Stop Signal Delay; <sup>d</sup>SSRT: Stop Signal Reaction Time; <sup>e</sup>ZRFT: Z-score Relative Finish Time.

**Table S2. Stop-Inhibit vs. Go trials in the erotic condition.**

| Tests and anatomical structures | X  | Y   | Z   | T-value |
|---------------------------------|----|-----|-----|---------|
| <b>Group</b>                    |    |     |     |         |
| <i>Motor cortex</i>             | 20 | -36 | 60  | 5.71**  |
| <i>Cerebellum</i>               | 24 | -16 | 52  | 5.18**  |
|                                 | 20 | -44 | -28 | 4.52**  |
|                                 | 16 | -34 | -32 | 3.66**  |
| <b>PD-HS &gt; PD+HS off</b>     |    |     |     |         |
| <i>Cingulate</i>                | 18 | -10 | 46  | 5.77    |
| <i>Superior parietal lobe</i>   | 26 | -24 | 50  | 4.91    |
| <i>Motor cortex</i>             | 20 | -36 | 62  | 4.5     |

Tests and anatomical structures for the successful (*stop-inhibit*) vs *go* trials contrast in the erotic condition.  $p < 0.05$  FWE cluster-wise corrected; \* $p < .005$ ; \*\* $p < .001$ .



**Table S3. Stop Success vs Stop Fail under erotic condition.**

| Tests and anatomical structures               | X   | Y   | Z  | T-value |
|-----------------------------------------------|-----|-----|----|---------|
| <b>Medication</b>                             |     |     |    |         |
| <i>Superior parietal lobe</i>                 | -44 | -24 | 46 | 4.18**  |
|                                               | -50 | -30 | 50 | 3.86**  |
|                                               | -46 | -38 | 52 | 3.41**  |
| <i>Anterior cingulate cortex (ACC)</i>        | -12 | 10  | 40 | 3.75*   |
| <i>Pre-supplementary motor area (pre-SMA)</i> | 6   | 20  | 56 | 3.41*   |
| <i>Supplementary motor area</i>               | 0   | -8  | 70 | 3.20*   |
| <b>PD+HS on &gt; off</b>                      |     |     |    |         |
| <i>Frontal pole</i>                           | 16  | 62  | 18 | 4.44**  |
| <i>Anterior cingulate cortex (ACC)</i>        | 0   | 24  | 14 | 4.13**  |
| <i>Inferior-frontal gyrus</i>                 | 30  | 46  | 10 | 4.06**  |
| <i>Supplementary motor area</i>               | -4  | 6   | 44 | 3.69*   |
|                                               | -6  | 6   | 56 | 3.34*   |
|                                               | 10  | 6   | 50 | 3.27*   |
| <b>PD+HS &gt; PD-HS on</b>                    |     |     |    |         |
| <i>Superior parietal lobe</i>                 | -44 | -24 | 46 | 4.73**  |
|                                               | -50 | -30 | 50 | 4.34**  |
|                                               | -46 | -38 | 52 | 3.81**  |
| <i>Pre-supplementary motor area (pre-SMA)</i> | -12 | 10  | 40 | 4.21**  |
|                                               | 6   | 20  | 56 | 3.81**  |
|                                               | -24 | 14  | 62 | 3.59*   |

Tests and anatomical structures for the successful (*stop-inhibit*) vs unsuccessful (*failed*) stop trials contrast in the erotic condition.  $p < .05$

FWE cluster-wise corrected; \* $p < .005$ ; \*\* $p < .001$ .

**Table S4. Stop fail in Erotic vs. Non-erotic trials.**

| Tests & Anatomical structures                  | X   | Y   | Z  | T-value |
|------------------------------------------------|-----|-----|----|---------|
| <b>Medication x Group</b>                      |     |     |    |         |
| <i>Superior parietal lobe</i>                  | -44 | -28 | 46 | 4.27**  |
| <i>Premotor area (BA6)</i>                     | -36 | -12 | 64 | 3.85*   |
| <i>Supplementary motor area (Pre-SMA; BA6)</i> | 0   | -6  | 68 | 3.31*   |
| <i>Superior frontal gyrus (BA6)</i>            | -16 | 2   | 68 | 3.26*   |
| <b>PD+HS on &gt; off</b>                       |     |     |    |         |
| <i>Caudate</i>                                 | -4  | 8   | 8  | 4.16*^  |
|                                                | -4  | 6   | 18 | 3.51*^  |
|                                                | -12 | 2   | 14 | 3.18*^  |
| <b>PD+HS &gt; PD-HS on</b>                     |     |     |    |         |
| <i>Superior parietal lobe (BA31)</i>           | -52 | -20 | 52 | 4.11**  |
| <i>Caudate</i>                                 | -10 | -4  | 20 | 3.92*   |
|                                                | -10 | 8   | 14 | 3.65*   |
|                                                | -4  | 10  | 6  | 3.56*   |

Tests and anatomical structures for unsuccessful stop (*stop-fail*) in erotic vs. non-erotic trials,  $p < .05$  FWE cluster-wise corrected;

\* $p < .005$ ; \*\* $p < .001$ .

**Table S5. Behavioral results of the stop signal task (study 2) after real and sham intermittent theta burst stimulation.**

|                                     | Real<br>Erotic | Sham<br>Erotic | <i>p</i> -value | Real<br>Non-erotic | Sham<br>Non-erotic | <i>p</i> -value |
|-------------------------------------|----------------|----------------|-----------------|--------------------|--------------------|-----------------|
| Go RT <sup>a</sup> (ms)             | 564.82±106.38  | 593.96±115.52  | .06             | 552.00±93.11       | 581.68±105.52      | .05             |
| StopRespond<br>RT <sup>a</sup> (ms) | 213.05±90.92   | 242.50±106.40  | .11             | 222.71±109.09      | 221.95±106.88      | .96             |
| <i>p</i> (stop)% <sup>b</sup>       | 71.37±14.56    | 70.50±19.11    | .72             | 71.17±13.78        | 71.20±17.70        | .99             |
| SSD <sup>c</sup> (ms)               | 304.99±128.79  | 303.31±137.56  | .89             | 297.72±118.86      | 307.27±136.37      | .47             |
| SSRT (ms)                           | 341.51±138.42  | 392.47±155.06  | .02             | 352.12±182.19      | 398.13±204.05      | .04             |
| ZRFT (ms)                           | -0.56±0.54     | -0.56±0.63     | .98             | -0.58±0.66         | -0.63±0.69         | .59             |
| Discrimination<br>errors (total)    | 2.89±3.53      | 2.50±3.24      | .62             | 3.33±4.46          | 2.83±3.93          | .61             |

Comparisons of task measures between real and sham sessions for erotic and non-erotic trials (*p* value: paired t-tests). <sup>a</sup>RT = reaction time;

<sup>b</sup>*p*(stop)% = % probability of stopping; <sup>c</sup>SSD = Stop Signal Delay; <sup>d</sup>SSRT: Stop Signal Reaction Time; <sup>e</sup>ZRFT: Z-score Relative Finish Time.

## Supplementary Figures

**Figure S1. Structure of the 13 DCMs tested and selection of most likely model.**

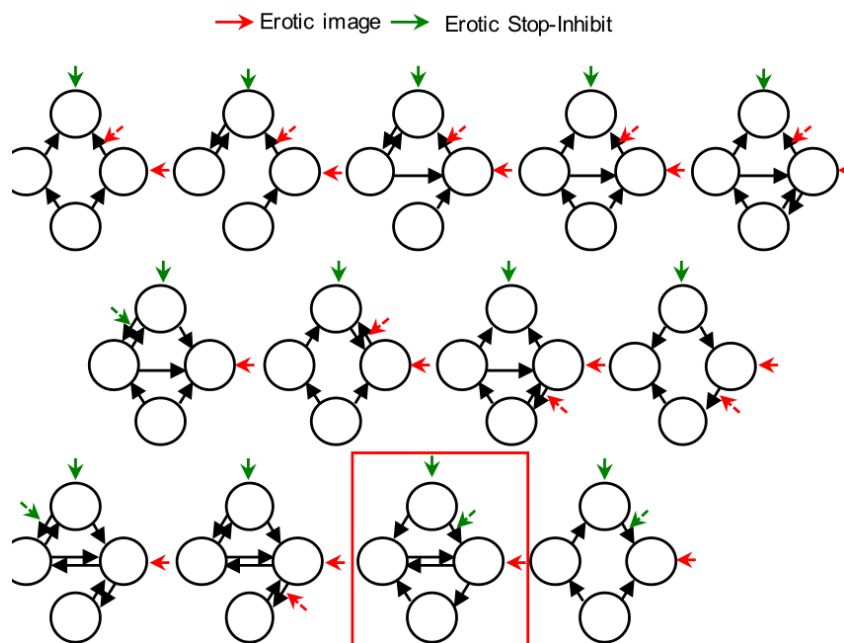

The 13 generative models represent alternative hypotheses of cortico-subcortical interactions during cognitive control while exposed to sexual cues in hypersexuality. The most likely model after BMS is highlighted in red square.

**Figure S2. Bayesian factor sequential analysis for SSRT.**

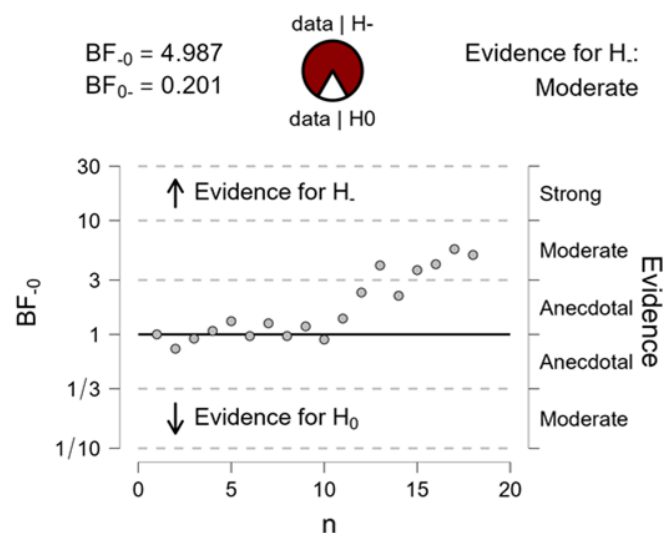

**Figure S3. StopInhibit vs. StopFail activity maps.**

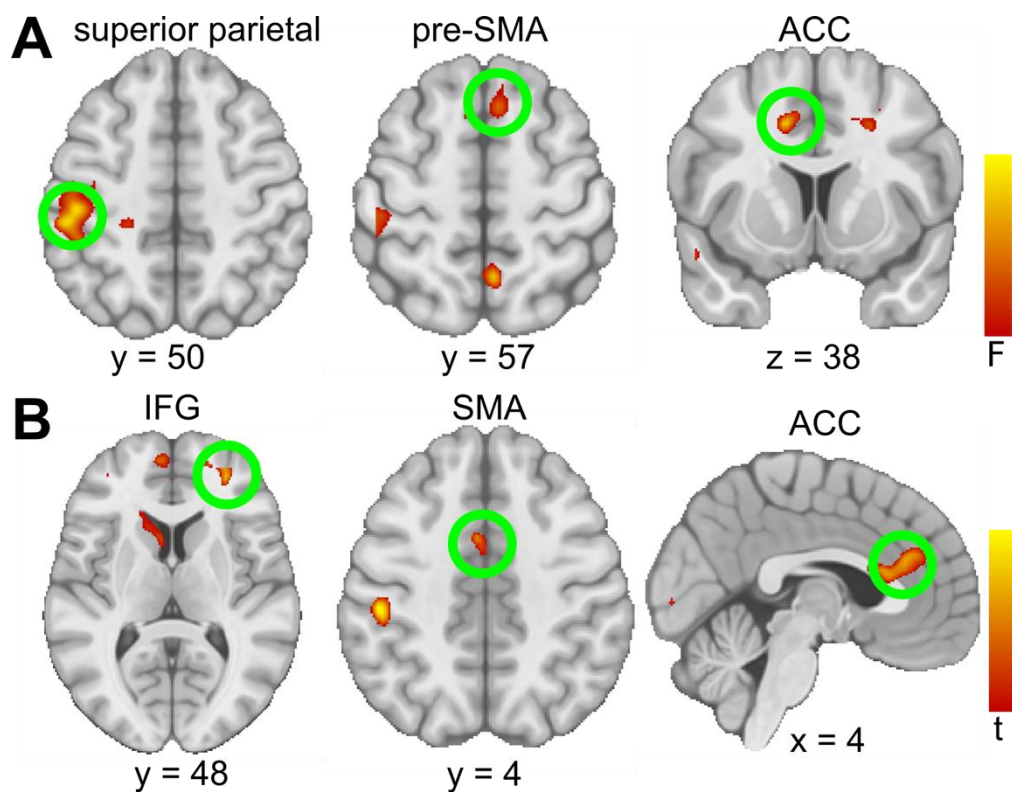

(A) Main effect of medication and (B) activity driven by PD+HS patients (on vs off medication). IFG = Inferior-frontal gyrus.

**Figure S4. Tracts representation and DTI scalar measures (FA, MD\*) for controls.**

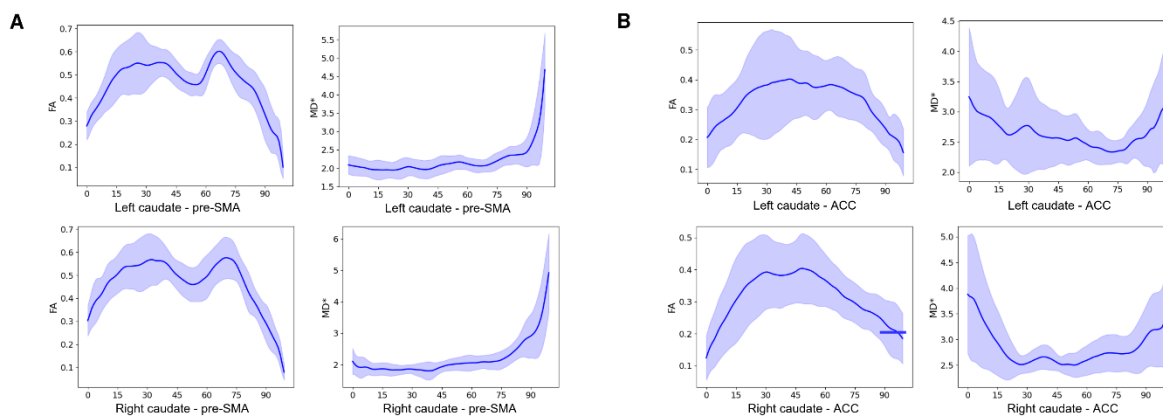

(A) Fractional anisotropy (FA) and mean diffusivity (MD) along the segments of right-left caudate and pre-SMA tracts and (B), along the segments of right-left caudate and anterior cingulate cortex tracts.

**Figure S5. Correlation between diffusion tensor imaging (DTI) scalar measures – fractional anisotropy (FA), mean diffusivity (MD\*) – and SSRT.**

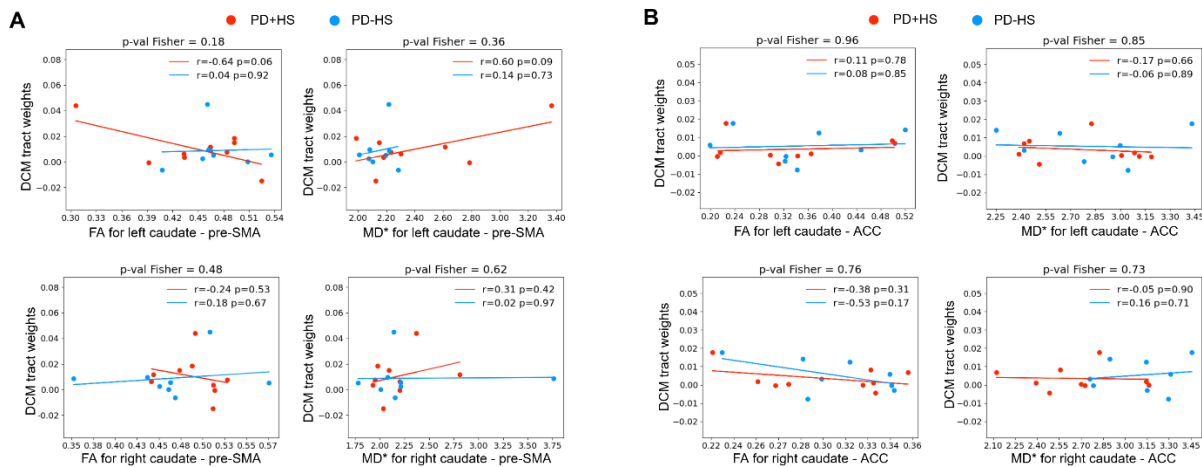

Comparisons included PD+HS (n=10) and PD-HS patients (n=14). (A) Correlation between FA and SSRT; (B) Correlation between MD\* and SSRT (MD\* is also called trace or TR, which is MD\*3).

**Figure S6. Correlation between DTI scalar measures (FA, MD\*) and DCM parameters.**

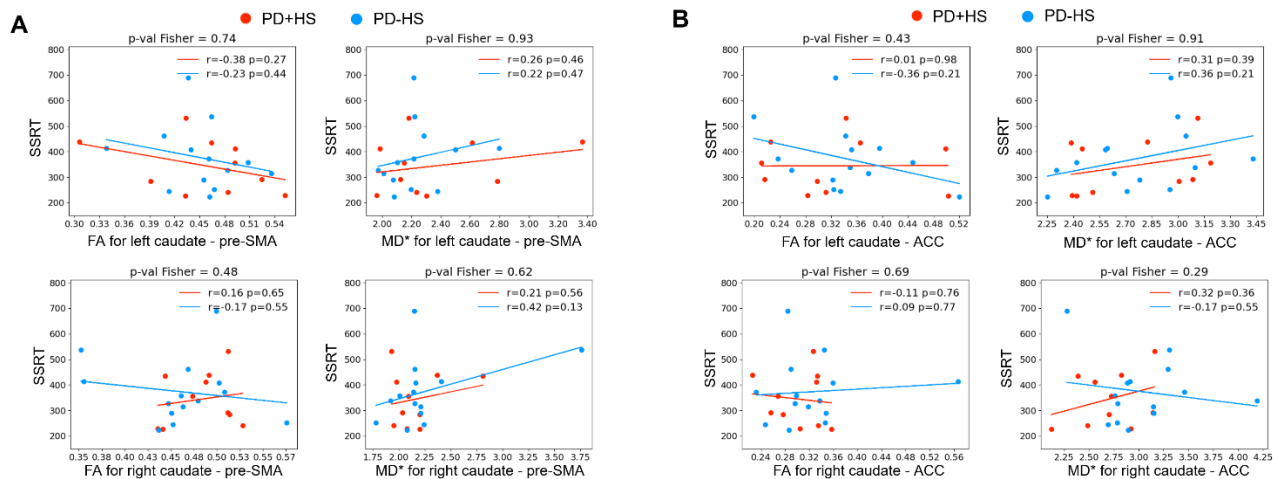

Comparisons included PD+HS (n=9) and PD-HS patients (n=8). (A) Correlation between FA and DCM parameters; (B) Correlation between MD\* and DCM parameters (MD\* is also called trace or TR, which is MD\*3).

**Figure S7. Bayesian factor sequential analysis for SSRT.**

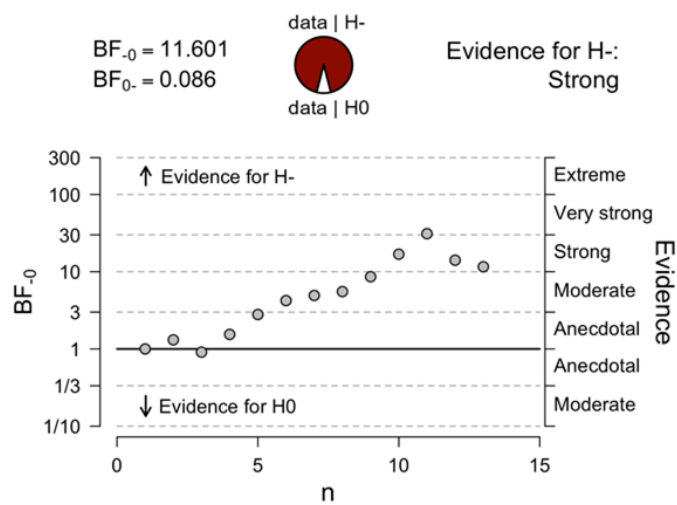

Source: https://www.medrxiv.org/content/medrxiv/early/2022/01/25/2022.01.25.22269798.full.pdf
